# Supplementary material for: Trends and Disparities in Cardiovascular Disease Burden Among Leukemia Related Deaths in the United States (1999–2020): A CDC WONDER Disproportionality Analysis
Source: Research Square preprint supplement (doi:10.21203/rs.3.rs-7777208/v1), 2025-11-11
Supplement: Supplementary file 1 [file a80fb58c30680cac53ebae72.docx]

**Supplementary Material**

**Calculations:**

**CVD Burden in Leukemia Mortality (A/B Ratio)**: The first step involves calculating the burden of CVD within the population of a specific cancer-related deaths (in our case Leukemia). This is done by determining the ratio of deaths where both CVD and cancer are listed on the death certificate (A) to the total number of cancer-related deaths (B):

CVD Burden in Cancer Mortality = A/B = X

Here, A represents the deaths where CVD was documented alongside cancer, capturing the intersection of these two significant causes of mortality. B serves as the denominator, encompassing all cancer-related deaths, thereby contextualizing the burden of CVD within this specific population. The ratio is denoted as X for ease in future steps.

**CVD Burden in All Cause Deaths (C/D Ratio)**: The second step is the calculation of CVD Burden in All-Cause Deaths. C represents the total number of deaths where CVD was listed as a cause, while D represents all-cause mortality. The ratio is denoted by Y. The formula used is:

CVD Burden in All Deaths = = Y

**Returning Odds Ratio (ROR):** The returning odds ratio is derived by comparing the CVD burden in a specific cancer population (Leukemia) to the CVD burden in the non-cancer population. This is expressed as:

ROR= CVD Burden in Leukemia / CVD Burden in All Deaths =

The ROR effectively quantifies how the burden of CVD in cancer patients compares to the general patients. A ROR greater than 1 suggests a higher relative burden of CVD in the cancer population compared to the general population, while a ROR less than 1 indicates a lower relative burden.

**Supplementary Legend**

**Supplementary Figure 1:** CVD Burden in Leukemia-Related Reporting Odds Ratio Stratified by Age Group in the Unites States, 1999-2020

**Supplementary Figure 2:** CVD Burden in Leukemia-Related Reporting Odds Ratio Stratified by Sex and Age Group in the Unites States, 1999-2020

**Supplementary Figure 3:** CVD Burden in Leukemia-Related Reporting Odds Ratio Stratified by Region and Age Group in the Unites States, 1999-2020

**Supplementary Figure 4:** CVD Burden in Leukemia-Related Reporting Odds Ratio Stratified by Race and Age Group in the Unites States, 1999-2020

**Supplementary Figure 5:** CVD Burden in Leukemia-Related Reporting Odds Ratio Stratified by Urbanization and Age Group in the Unites States, 1999-2020

**Supplementary Table 1:** Total Deaths and Reporting Odds Ratio of CVD Burden in Leukemia in Individuals aged 15-85+ in United States from 1999-2020

**Supplementary Table 2**: Average Annual Percent Change (AAPC) of CVD Burden in Leukemia, related Reporting Odds Ratio in the United States, 1999 to 2020

**Supplementary Table 3:** CVD Burden in Leukemia and All Cause Deaths-Related Proportions across Age Groups 15-85+ in the Unites States, 1999-2020

**Supplementary Table 4:** CVD Burden in Leukemia-Related Reporting Odds Ratio Stratified by Sex and Urbanization in the Unites States, 1999-2020

**Supplementary Table 5:** CVD Burden in Leukemia-Related Reporting Odds Ratio Stratified by Census Regions in the Unites States, 1999-2020

**Supplementary Table 6:** CVD Burden in Leukemia-Related Reporting Odds Ratio Stratified by Race in the Unites States, 1999-2020

**Supplementary Table 7:** CVD Burden in Leukemia-Related Deaths Reporting Odds Ratio Stratified by Census Place of Death in the Unites States, 1999-2020


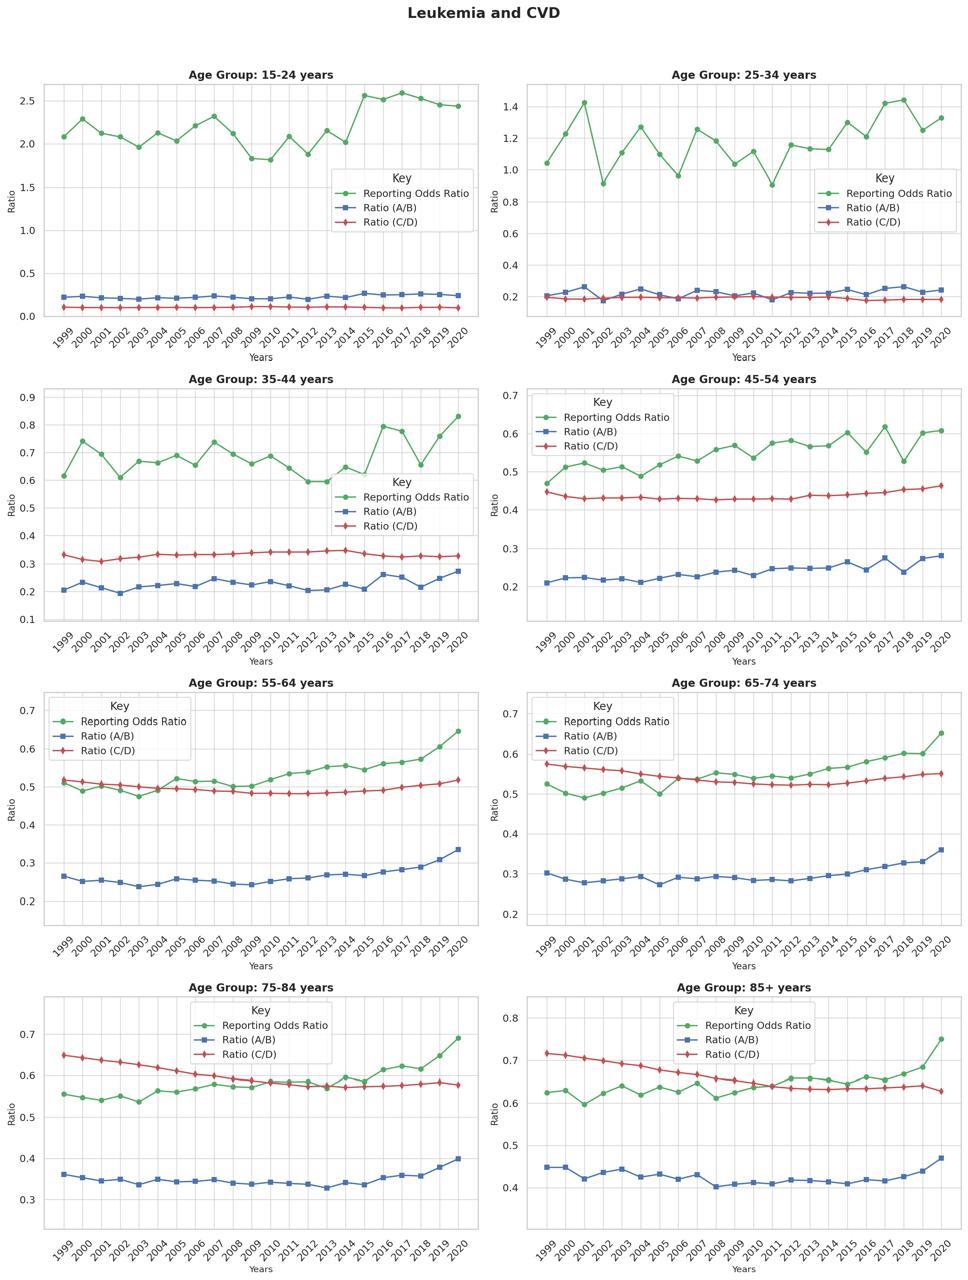


**Supplementary Figure 1:** CVD Burden in Leukemia-Related Reporting Odds Ratio Stratified by Age Group in the Unites States, 1999-2020


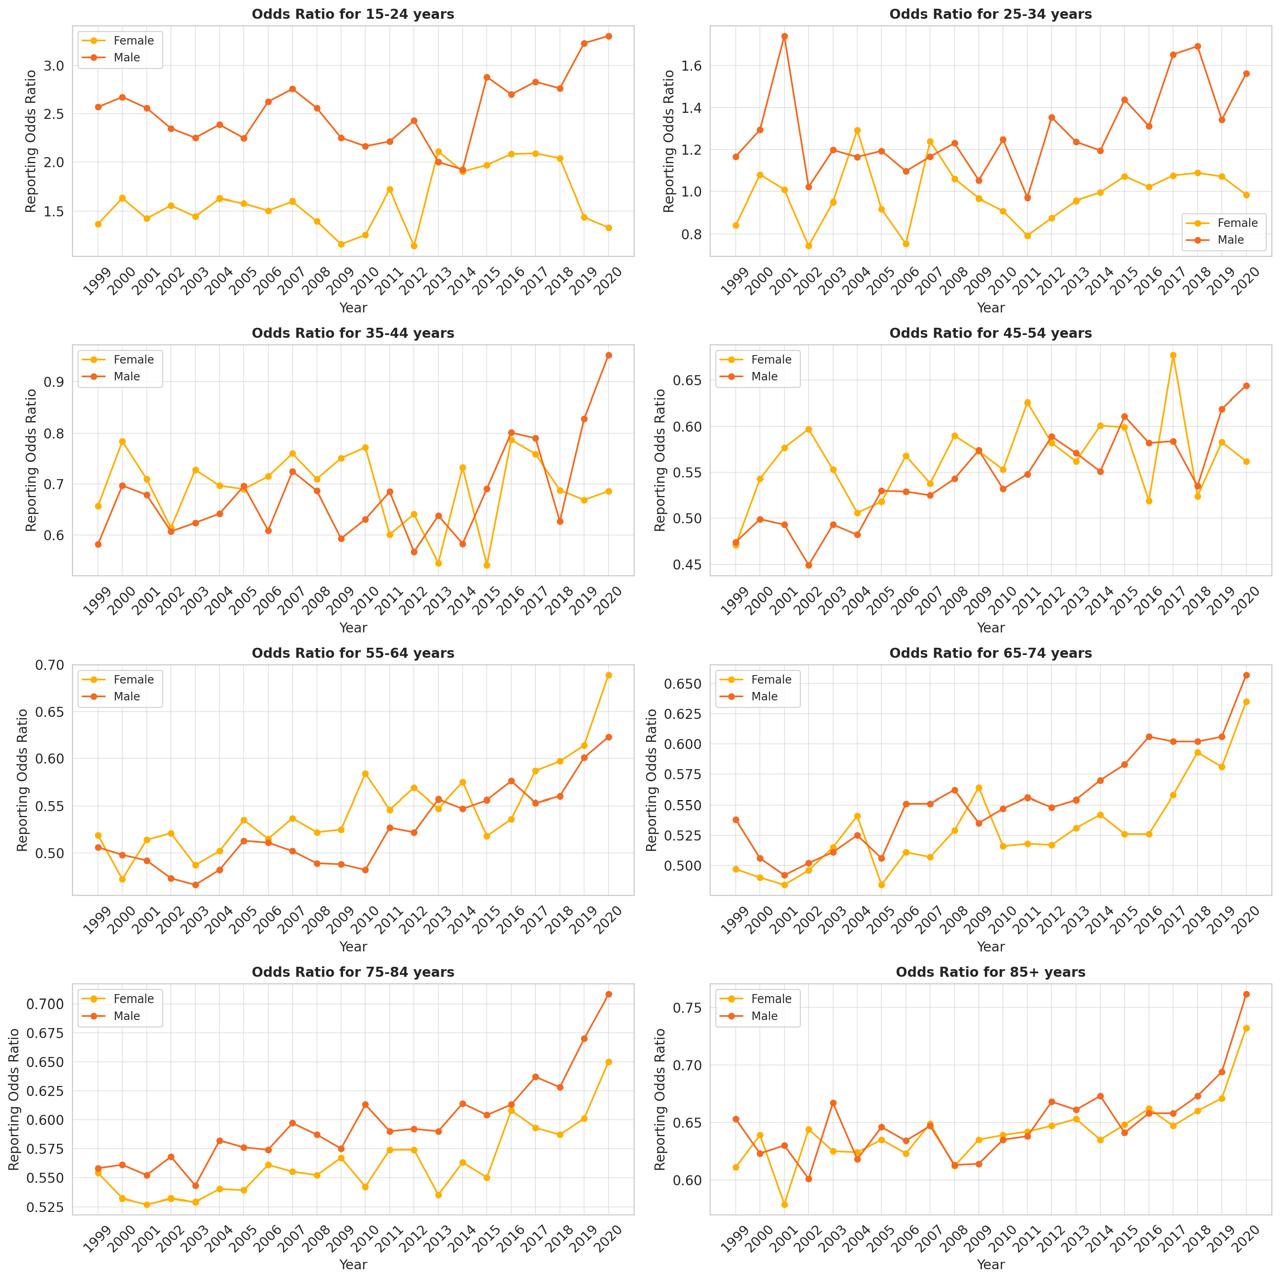


**Supplementary Figure 2:** CVD Burden in Leukemia-Related Reporting Odds Ratio Stratified by Sex and Age Group in the Unites States, 1999-2020


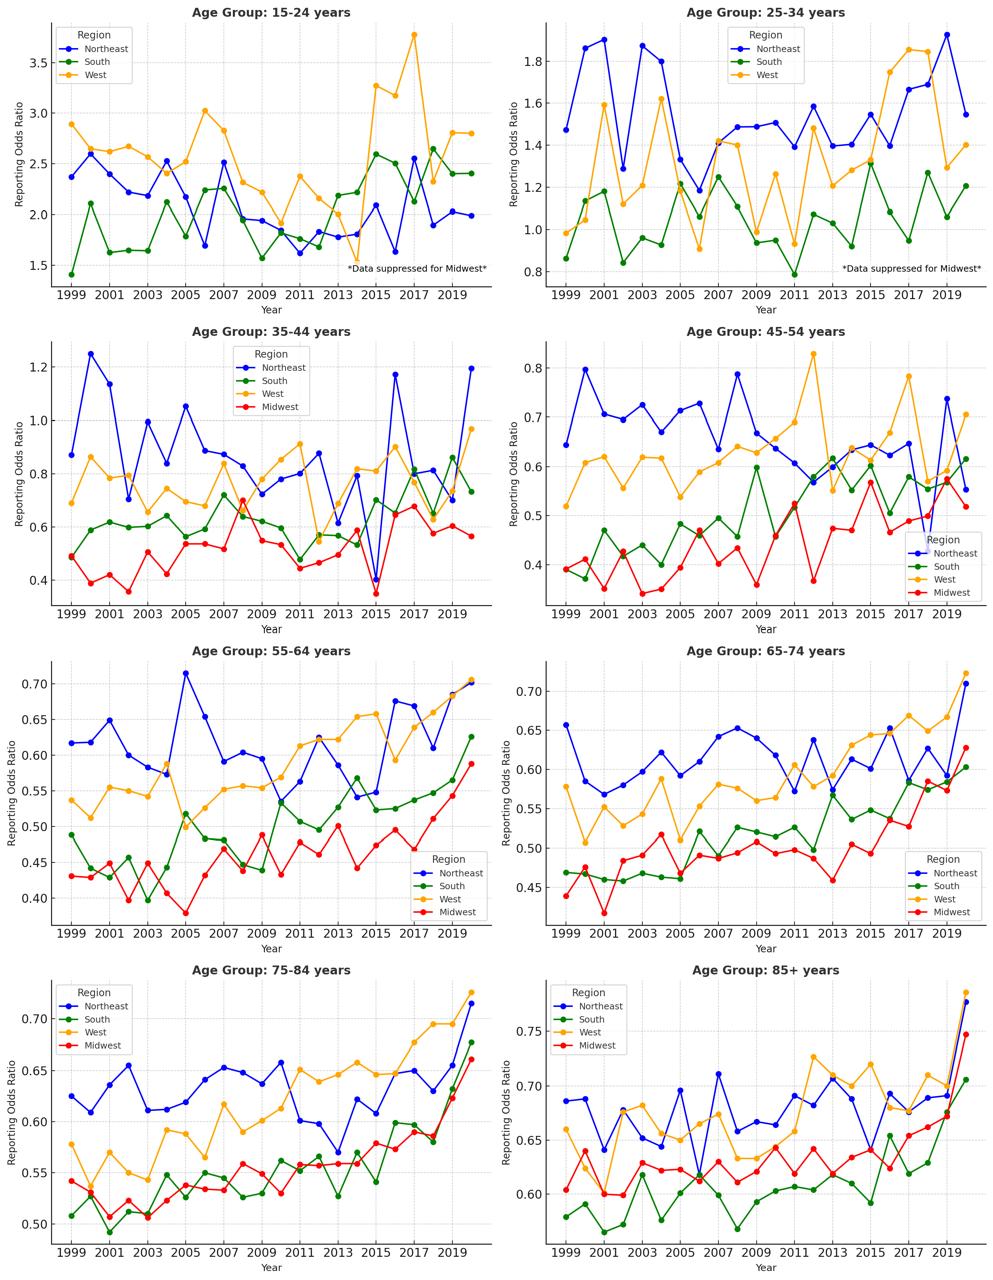


**Supplementary Figure 3:** CVD Burden in Leukemia-Related Reporting Odds Ratio Stratified by Region and Age Group in the Unites States, 1999-2020


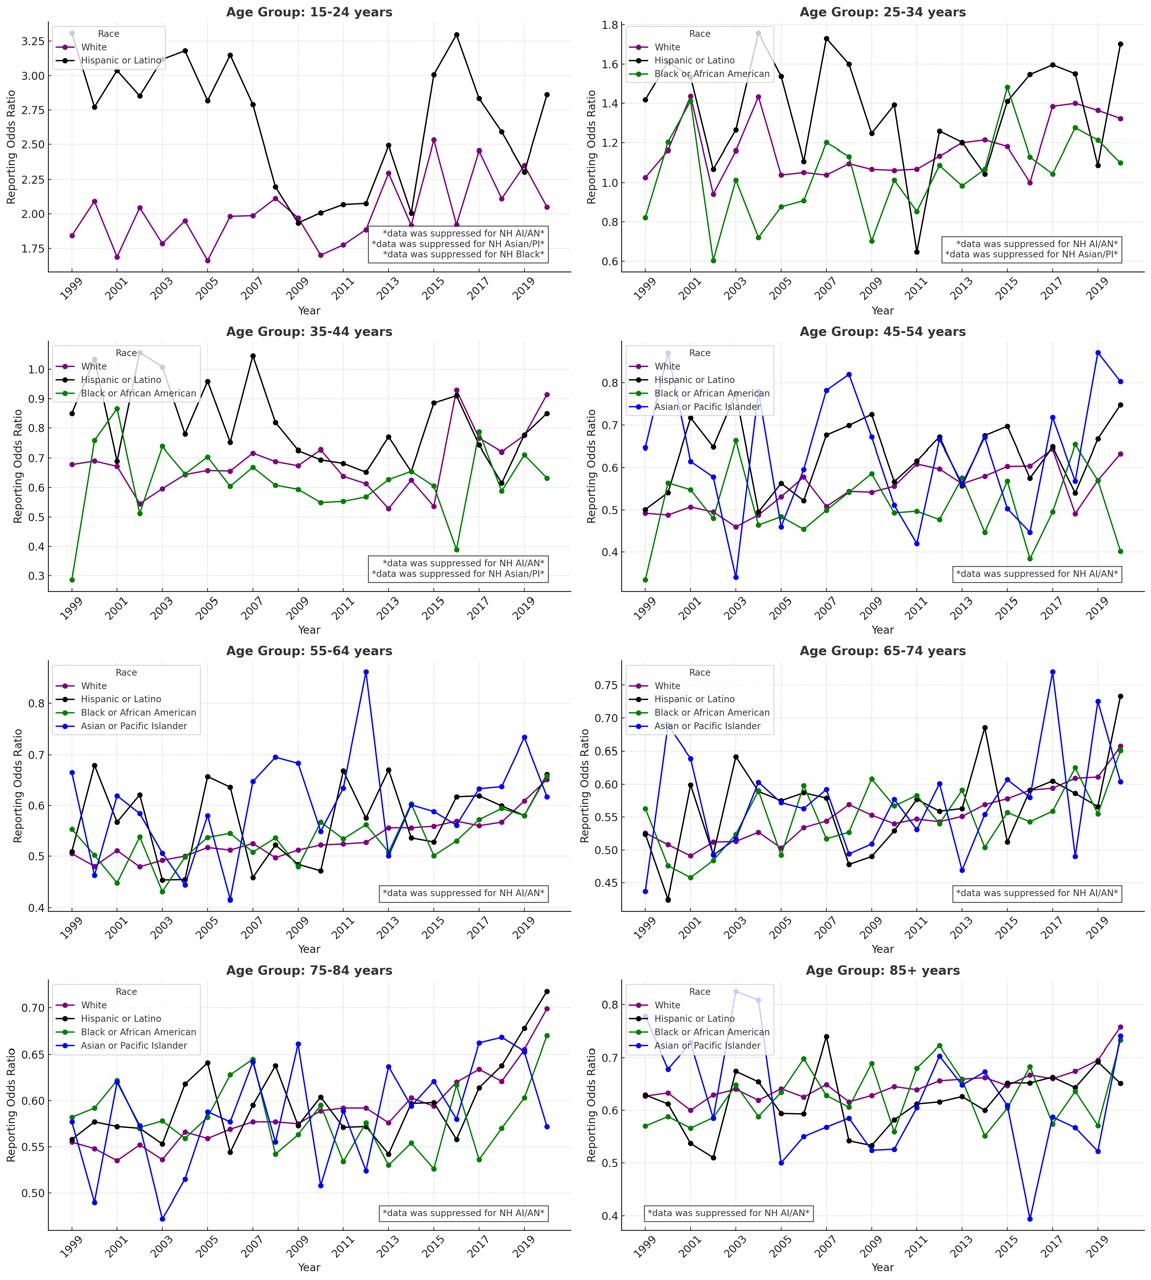


**Supplementary Figure 4:** CVD Burden in Leukemia-Related Reporting Odds Ratio Stratified by Race and Age Group in the Unites States, 1999-2020

**
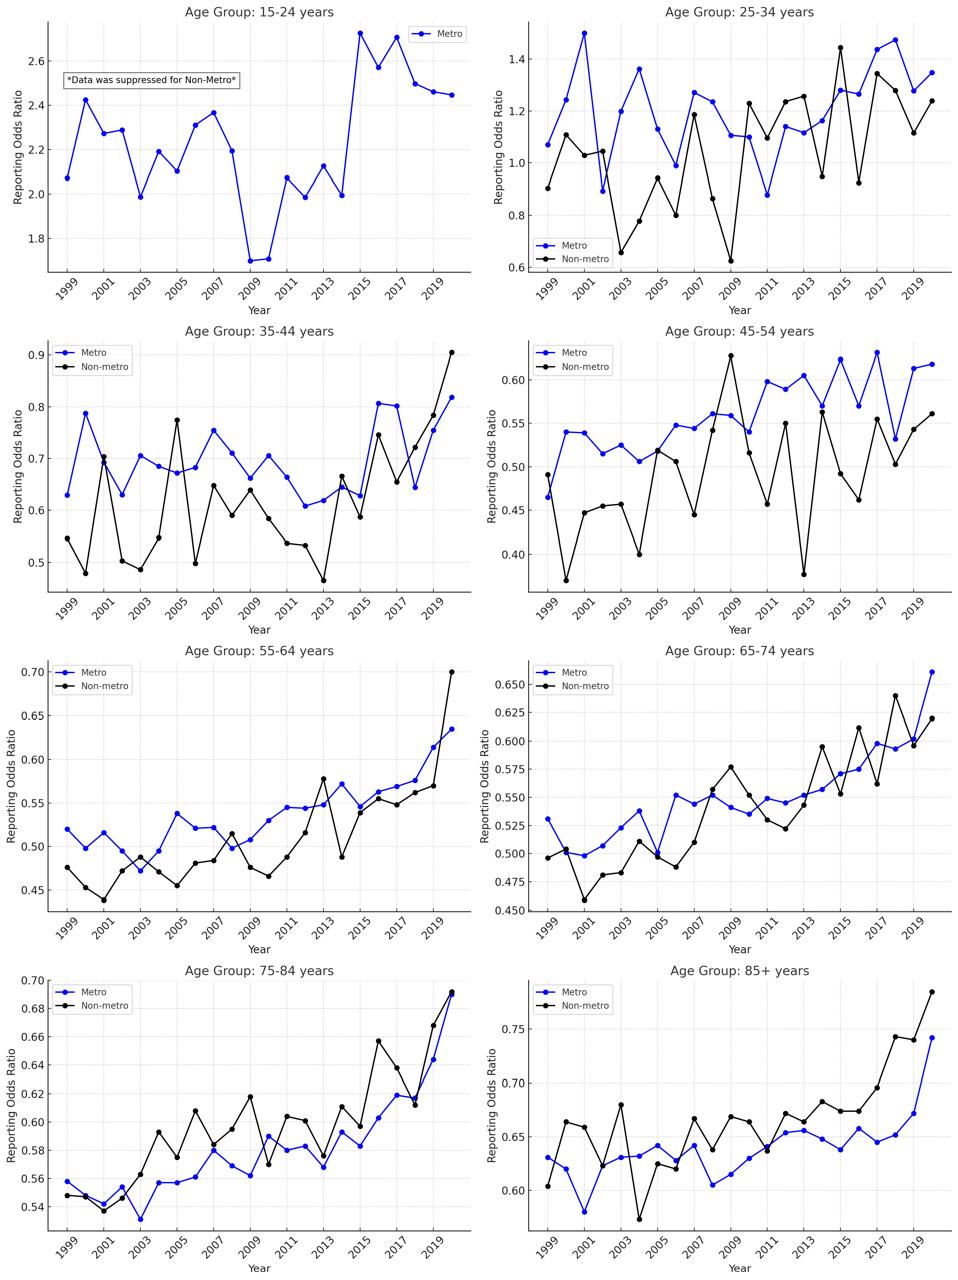
**

**Supplementary Figure 5:** CVD Burden in Leukemia-Related Reporting Odds Ratio Stratified by Urbanization and Age Group in the Unites States, 1999-2020

| **Supplementary Table 1: Total Deaths and Reporting Odds Ratio of CVD Burden in Leukemia in Individuals aged 15-85+ in United States from 1999-2020** | | | | | | | |
| --- | --- | --- | --- | --- | --- | --- | --- |
| **Deaths and Reporting Odds Ratio (95% CI)** | | | | | | | |
| **Cohort** | **Leukemia and CVD Deaths (A)** | **Total Leukemia Deaths (B)** | **Total CVD Deaths (C)** | **All-Cause Deaths (D)** | **A/B** | **C/D** | **ROR (95% CI)** |
| **15-24 Age Group** | | | | | | | |
| Overall | 2107 | 9384 | 71932 | 696479 | 0.225 | 0.103 | 2.174 (2.072-2.281) |
| Female | 794 | 3560 | 25714 | 182871 | 0.223 | 0.141 | 1.586 (1.467-1.715) |
| Male | 1313 | 5824 | 46218 | 513608 | 0.225 | 0.09 | 2.505 (2.358-2.662) |
| NH American Indian | 16 | 107 | 935 | 12351 | 0.15 | 0.076 | 1.975 (1.163-3.354) |
| NH Asian Pacific | 119 | 403 | 2354 | 17506 | 0.295 | 0.134 | 2.196 (1.782-2.706) |
| NH Black | 341 | 1311 | 18505 | 156196 | 0.26 | 0.118 | 2.195 (1.947-2.476) |
| NH White | 947 | 4859 | 38523 | 389760 | 0.195 | 0.099 | 1.972 (1.838-2.116) |
| Hispanic | 683 | 2685 | 11448 | 118666 | 0.254 | 0.096 | 2.637 (2.419-2.874) |
| Northeast | 1462 | 6118 | 11330 | 99222 | 0.239 | 0.114 | 2.093 (1.97-2.223) |
| Midwest | 286 | 1802 | 14325 | 151729 | 0.159 | 0.094 | 1.681 (1.482-1.907) |
| South | 732 | 3512 | 30401 | 292574 | 0.208 | 0.104 | 2.006 (1.851-2.174) |
| West | 691 | 2595 | 15876 | 152954 | 0.266 | 0.104 | 2.565 (2.355-2.794) |
| Metro | 1851 | 8079 | 58871 | 571297 | 0.229 | 0.103 | 2.223 (2.112-2.34) |
| Non metro | 256 | 1305 | 13061 | 125182 | 0.196 | 0.104 | 1.88 (1.642-2.152) |
| **25-34 Age Group** | | | | | | | |
| Overall | 2299 | 10308 | 197669 | 1043043 | 0.223 | 0.19 | 1.177 (1.125-1.232) |
| Female | 955 | 4199 | 73210 | 317873 | 0.227 | 0.23 | 0.988 (0.92-1.06) |
| Male | 1344 | 6109 | 124459 | 725170 | 0.22 | 0.172 | 1.282 (1.208-1.36) |
| NH American Indian | 20 | 101 | 3247 | 18799 | 0.198 | 0.173 | 1.146 (0.709-1.855) |
| NH Asian Pacific | 145 | 527 | 5837 | 25727 | 0.275 | 0.227 | 1.213 (1.007-1.461) |
| NH Black | 378 | 1536 | 54190 | 228840 | 0.246 | 0.237 | 1.039 (0.928-1.163) |
| NH White | 1174 | 5766 | 106559 | 613934 | 0.204 | 0.174 | 1.173 (1.101-1.249) |
| Hispanic | 578 | 2360 | 27267 | 152348 | 0.245 | 0.179 | 1.368 (1.248-1.5) |
| Northeast | 517 | 1722 | 30308 | 162275 | 0.3 | 0.187 | 1.608 (1.456-1.775) |
| Midwest | 320 | 2037 | 39020 | 218478 | 0.157 | 0.179 | 0.88 (0.781-0.99) |
| South | 805 | 3942 | 86053 | 442618 | 0.204 | 0.194 | 1.05 (0.973-1.133) |
| West | 657 | 2607 | 42288 | 219672 | 0.252 | 0.193 | 1.309 (1.201-1.427) |
| Metro | 1999 | 8839 | 163401 | 870520 | 0.226 | 0.188 | 1.205 (1.147-1.265) |
| Non metro | 300 | 1469 | 34268 | 172523 | 0.204 | 0.199 | 1.028 (0.908-1.165) |
| **35-44 Age Group** | | | | | | | |
| Overall | 3501 | 15495 | 591314 | 1783349 | 0.226 | 0.332 | 0.681 (0.657-0.707) |
| Female | 1586 | 6965 | 216042 | 657934 | 0.228 | 0.328 | 0.693 (0.657-0.732) |
| Male | 1915 | 8530 | 375272 | 1125415 | 0.225 | 0.333 | 0.673 (0.641-0.708) |
| NH American Indian | 24 | 102 | 8131 | 27471 | 0.235 | 0.296 | 0.795 (0.509-1.241) |
| NH Asian Pacific | 177 | 695 | 16065 | 42385 | 0.255 | 0.379 | 0.672 (0.569-0.793) |
| NH Black | 607 | 2352 | 153115 | 370955 | 0.258 | 0.413 | 0.625 (0.572-0.684) |
| NH White | 1978 | 9568 | 345816 | 1128801 | 0.207 | 0.306 | 0.675 (0.643-0.708) |
| Hispanic | 704 | 2735 | 66081 | 207045 | 0.257 | 0.319 | 0.806 (0.742-0.877) |
| Northeast | 825 | 2802 | 94303 | 285852 | 0.294 | 0.33 | 0.892 (0.826-0.965) |
| Midwest | 509 | 3134 | 118991 | 372149 | 0.162 | 0.32 | 0.508 (0.462-0.558) |
| South | 1257 | 5926 | 258328 | 760726 | 0.212 | 0.34 | 0.625 (0.588-0.664) |
| West | 910 | 3633 | 119692 | 364622 | 0.25 | 0.328 | 0.763 (0.709-0.821) |
| Metro | 3010 | 13167 | 485353 | 1475982 | 0.229 | 0.329 | 0.695 (0.668-0.723) |
| Non metro | 491 | 2328 | 105961 | 307367 | 0.211 | 0.345 | 0.612 (0.555-0.675) |
| **45-54 Age Group** | | | | | | | |
| Overall | 7591 | 31906 | 1688707 | 3869682 | 0.238 | 0.436 | 0.545 (0.532-0.559) |
| Female | 3116 | 13860 | 592787 | 1483779 | 0.225 | 0.4 | 0.563 (0.541-0.585) |
| Male | 4475 | 18046 | 1095920 | 2385903 | 0.248 | 0.459 | 0.54 (0.522-0.558) |
| NH American Indian | 37 | 189 | 17999 | 44101 | 0.196 | 0.408 | 0.48 (0.337-0.683) |
| NH Asian Pacific | 325 | 1128 | 39904 | 85699 | 0.288 | 0.466 | 0.619 (0.547-0.7) |
| NH Black | 1188 | 4485 | 388127 | 744429 | 0.265 | 0.521 | 0.508 (0.477-0.542) |
| NH White | 5078 | 22700 | 1085268 | 2640418 | 0.224 | 0.411 | 0.544 (0.528-0.561) |
| Hispanic | 933 | 3325 | 150497 | 339146 | 0.281 | 0.444 | 0.632 (0.588-0.68) |
| Northeast | 1705 | 5770 | 282998 | 638744 | 0.295 | 0.443 | 0.667 (0.632-0.704) |
| Midwest | 1316 | 7212 | 349657 | 837077 | 0.182 | 0.418 | 0.437 (0.412-0.463) |
| South | 2694 | 12065 | 719654 | 1623761 | 0.223 | 0.443 | 0.504 (0.483-0.525) |
| West | 1876 | 6859 | 336398 | 770100 | 0.274 | 0.437 | 0.626 (0.595-0.659) |
| Metro | 6456 | 26704 | 1379063 | 3175567 | 0.242 | 0.434 | 0.557 (0.542-0.572) |
| Non metro | 1135 | 5202 | 309644 | 694115 | 0.218 | 0.446 | 0.489 (0.459-0.522) |
| **55-64 Age Group** | | | | | | | |
| Overall | 18582 | 70270 | 3413956 | 6885039 | 0.264 | 0.496 | 0.533 (0.525-0.542) |
| Female | 6803 | 27251 | 1239376 | 2718374 | 0.25 | 0.456 | 0.548 (0.533-0.562) |
| Male | 11779 | 43019 | 2174580 | 4166665 | 0.274 | 0.522 | 0.525 (0.514-0.535) |
| NH American Indian | 93 | 349 | 29288 | 58938 | 0.266 | 0.497 | 0.536 (0.426-0.674) |
| NH Asian Pacific | 572 | 1792 | 76338 | 146387 | 0.319 | 0.521 | 0.612 (0.557-0.673) |
| NH Black | 2544 | 8186 | 666271 | 1157831 | 0.311 | 0.575 | 0.54 (0.517-0.565) |
| NH White | 13907 | 55157 | 2376345 | 5021170 | 0.252 | 0.473 | 0.533 (0.523-0.543) |
| Hispanic | 1406 | 4605 | 250791 | 473412 | 0.305 | 0.53 | 0.576 (0.543-0.612) |
| Northeast | 4105 | 13060 | 586151 | 1148457 | 0.314 | 0.51 | 0.616 (0.595-0.638) |
| Midwest | 3564 | 16399 | 718988 | 1529325 | 0.217 | 0.47 | 0.462 (0.446-0.479) |
| South | 6644 | 26592 | 1430197 | 2867979 | 0.25 | 0.499 | 0.501 (0.488-0.515) |
| West | 4269 | 14219 | 678620 | 1339278 | 0.3 | 0.507 | 0.593 (0.573-0.613) |
| Metro | 15303 | 57437 | 2749327 | 5556283 | 0.266 | 0.495 | 0.538 (0.529-0.548) |
| Non metro | 3279 | 12833 | 664629 | 1328756 | 0.256 | 0.5 | 0.511 (0.492-0.531) |
| **65-74 Age Group** | | | | | | | |
| Overall | 39803 | 133312 | 5436761 | 10034288 | 0.299 | 0.542 | 0.551 (0.545-0.557) |
| Female | 13622 | 49670 | 2244594 | 4348898 | 0.274 | 0.516 | 0.531 (0.521-0.542) |
| Male | 26181 | 83642 | 3192167 | 5685390 | 0.313 | 0.561 | 0.557 (0.55-0.565) |
| NH American Indian | 190 | 537 | 36239 | 64742 | 0.354 | 0.56 | 0.632 (0.535-0.746) |
| NH Asian Pacific | 914 | 2703 | 123773 | 211916 | 0.338 | 0.584 | 0.579 (0.537-0.624) |
| NH Black | 3894 | 11435 | 804351 | 1309819 | 0.341 | 0.614 | 0.555 (0.535-0.575) |
| NH White | 32603 | 112125 | 4109156 | 7835707 | 0.291 | 0.524 | 0.554 (0.548-0.561) |
| Hispanic | 2131 | 6256 | 344198 | 580953 | 0.341 | 0.592 | 0.575 (0.547-0.604) |
| Northeast | 8570 | 24666 | 991172 | 1754344 | 0.347 | 0.565 | 0.615 (0.6-0.63) |
| Midwest | 8372 | 32214 | 1176110 | 2280440 | 0.26 | 0.516 | 0.504 (0.492-0.516) |
| South | 13934 | 49838 | 2196329 | 4086490 | 0.28 | 0.537 | 0.52 (0.51-0.53) |
| West | 8927 | 26594 | 1073150 | 1913014 | 0.336 | 0.561 | 0.598 (0.584-0.613) |
| Metro | 32095 | 107144 | 4325213 | 7988242 | 0.3 | 0.541 | 0.553 (0.546-0.56) |
| Non metro | 7708 | 26168 | 1111548 | 2046046 | 0.295 | 0.543 | 0.542 (0.529-0.556) |
| **75-84 Age Group** | | | | | | | |
| Overall | 65287 | 186947 | 8811638 | 14723222 | 0.35 | 0.6 | 0.584 (0.578-0.589) |
| Female | 25392 | 76462 | 4374987 | 7382049 | 0.33 | 0.59 | 0.56 (0.552-0.568) |
| Male | 39895 | 110485 | 4436651 | 7341173 | 0.36 | 0.6 | 0.597 (0.591-0.604) |
| NH American Indian | 177 | 473 | 36771 | 61070 | 0.37 | 0.6 | 0.621 (0.523-0.739) |
| NH Asian Pacific | 1176 | 3092 | 191772 | 297725 | 0.38 | 0.64 | 0.59 (0.552-0.632) |
| NH Black | 4242 | 11292 | 884453 | 1367405 | 0.38 | 0.65 | 0.581 (0.561-0.602) |
| NH White | 56837 | 164719 | 7215497 | 12244092 | 0.35 | 0.59 | 0.586 (0.58-0.591) |
| Hispanic | 2728 | 7072 | 462615 | 721210 | 0.39 | 0.64 | 0.601 (0.575-0.629) |
| Northeast | 14369 | 36476 | 1775939 | 2839920 | 0.39 | 0.63 | 0.63 (0.618-0.642) |
| Midwest | 15111 | 47233 | 2007048 | 3472785 | 0.32 | 0.58 | 0.554 (0.543-0.564) |
| South | 21409 | 65890 | 3277507 | 5592404 | 0.32 | 0.59 | 0.554 (0.546-0.563) |
| West | 14398 | 37348 | 1751144 | 2818113 | 0.39 | 0.62 | 0.62 (0.609-0.633) |
| Metro | 52269 | 150707 | 7063713 | 11821779 | 0.35 | 0.6 | 0.58 (0.575-0.586) |
| Non metro | 13018 | 36240 | 1747925 | 2901443 | 0.36 | 0.6 | 0.596 (0.584-0.608) |
| **85+ Age Group** | | | | | | | |
| Overall | 56305 | 132383 | 11162674 | 16979000 | 0.425 | 0.657 | 0.647 (0.641-0.653) |
| Female | 29366 | 69301 | 7182135 | 10883756 | 0.424 | 0.66 | 0.642 (0.633-0.651) |
| Male | 26939 | 63082 | 3980539 | 6095244 | 0.427 | 0.653 | 0.654 (0.645-0.663) |
| NH American Indian | 94 | 200 | 26972 | 42672 | 0.47 | 0.632 | 0.744 (0.582-0.951) |
| NH Asian Pacific | 677 | 1620 | 226433 | 328516 | 0.418 | 0.689 | 0.606 (0.554-0.663) |
| NH Black | 2684 | 6373 | 785500 | 1169730 | 0.421 | 0.672 | 0.627 (0.599-0.656) |
| NH White | 51152 | 120210 | 9633475 | 14718613 | 0.426 | 0.655 | 0.65 (0.643-0.657) |
| Hispanic | 1611 | 3788 | 470114 | 689855 | 0.425 | 0.681 | 0.624 (0.589-0.662) |
| Northeast | 12786 | 27492 | 2484855 | 3627082 | 0.465 | 0.685 | 0.679 (0.665-0.693) |
| Midwest | 14206 | 34831 | 2696400 | 4199415 | 0.408 | 0.642 | 0.635 (0.623-0.648) |
| South | 16664 | 42789 | 3699313 | 5807840 | 0.389 | 0.637 | 0.611 (0.601-0.622) |
| West | 12649 | 27271 | 2282106 | 3344663 | 0.464 | 0.682 | 0.68 (0.666-0.694) |
| Metro | 45003 | 106816 | 9037541 | 13772027 | 0.421 | 0.656 | 0.642 (0.635-0.649) |
| Non metro | 11302 | 25567 | 2125133 | 3206973 | 0.442 | 0.663 | 0.667 (0.652-0.682) |

| **Supplementary Table 2:** **Average Annual Percent Change (AAPC) of CVD Burden in Leukemia, related Reporting Odds Ratio in the United States, 1999 to 2020** | | | | | |
| --- | --- | --- | --- | --- | --- |
| **Reporting Odds Ratio AAPC (1999-2020)** | | | | | |
| **Age Group** | **AAPC (95% CI)** | **p-value** | **Age Group** | **AAPC (95% CI)** | **p-value** |
| **Overall** | | | | | |
| 15-24 | 0.92 (-0.03-1.88) | 0.053189 | 55-64 | 1.18* (0.96-1.38) | < 0.000001 |
| 25-34 | 0.57 (-0.41-1.65) | 0.223155 | 65-74 | 1.13* (0.86-1.36) | < 0.000001 |
| 35-44 | 0.77 (-0.14-1.59) | 0.096381 | 75-84 | 1.16* (1.01-1.29) | < 0.000001 |
| 45-54 | 0.96* (0.61-1.35) | < 0.000001 | 85+ | 0.89* (0.67-1.05) | < 0.000001 |
| **CVD Burden in Leukemia Deaths (A/B)** | | | | | |
| 15-24 | 0.84* (0.33-1.38) | 0.003199 | 55-64 | 1.30* (1.04-1.5) | < 0.000001 |
| 25-34 | 0.34 (-0.41-1.15) | 0.365527 | 65-74 | 0.91* (0.72-1.13) | < 0.000001 |
| 35-44 | 0.76* (0.23-1.33) | 0.007199 | 75-84 | 0.57* (0.41-0.68) | < 0.000001 |
| 45-54 | 1.21* (0.93-1.52) | < 0.000001 | 85+ | 0.21* (0.02-0.36) | 0.031994 |
| **CVD Burden All Cause Deaths (C/D)** | | | | | |
| 15-24 | -0.21 (-0.52-0.14) | 0.137173 | 55-64 | -0.01 (-0.03-0.02) | 0.713457 |
| 25-34 | -0.17 (-0.47-0.09) | 0.153169 | 65-74 | -0.18* (-0.21--0.16) | < 0.000001 |
| 35-44 | -0.03 (-0.12-0.09) | 0.492701 | 75-84 | -0.53* (-0.56--0.5) | < 0.000001 |
| 45-54 | 0.16* (0.09-0.25) | < 0.000001 | 85+ | -0.58* (-0.62--0.55) | < 0.000001 |
| **Female** | | | | | |
| 15-24 | -0.54 (-2.29-1.35) | 0.546291 | 55-64 | 1.51* (0.95-1.86) | < 0.000001 |
| 25-34 | 0.07 (-1.03-1.19) | 0.931814 | 65-74 | 1.11* (0.83-1.41) | < 0.000001 |
| 35-44 | -0.11 (-0.97-0.7) | 0.689462 | 75-84 | 0.94* (0.53-1.18) | < 0.000001 |
| 45-54 | 0.49 (-0.08-1.09) | 0.09878 | 85+ | 0.77* (0.49-0.94) | < 0.000001 |
| **Male** | | | | | |
| 15-24 | 1.19* (0.26-2.01) | 0.014397 | 55-64 | 1.02* (0.71-1.38) | < 0.000001 |
| 25-34 | 1.64 (-0.13-3.45) | 0.053989 | 65-74 | 0.76* (0.48-1.23) | < 0.000001 |
| 35-44 | 1.59* (0.59-2.43) | 0.002 | 75-84 | 1.20* (0.99-1.36) | < 0.000001 |
| 45-54 | 1.27* (0.94-1.64) | < 0.000001 | 85+ | 0.90* (0.53-1.15) | < 0.000001 |
| **NH Asian or Pacific Islander** | | | | | |
| 15-24 | - | - | 55-64 | 0.57 (-0.48-2.07) | 0.209958 |
| 25-34 | - | - | 65-74 | 0.84* (0.02-2.09) | 0.046391 |
| 35-44 | - | - | 75-84 | 0.71* (0.01-1.76) | 0.046391 |
| 45-54 | 0.27 (-1.37-2.26) | 0.637872 | 85+ | -0.64 (-1.69-0.84) | 0.482304 |
| **NH Black or African American** | | | | | |
| 15-24 | - | - | 55-64 | 0.97* (0.43-1.67) | 0.0016 |
| 25-34 | 0.41 (-1.02-2) | 0.539492 | 65-74 | 0.74* (0.14-1.49) | 0.021996 |
| 35-44 | -0.74 (-1.87-0.28) | 0.14797 | 75-84 | 0.51 (-0.22-1) | 0.117976 |
| 45-54 | 0.04 (-1.25-1.4) | 0.958208 | 85+ | 0.45 (-0.3-1.36) | 0.187562 |
| **NH White** | | | | | |
| 15-24 | 0.98* (0.06-1.88) | 0.034793 | 55-64 | 1.43* (1.09-1.64) | < 0.000001 |
| 25-34 | 0.42 (-0.52-1.35) | 0.380724 | 65-74 | 1.13* (0.89-1.37) | < 0.000001 |
| 35-44 | 1.26* (0.35-2.18) | 0.007598 | 75-84 | 1.24* (1.09-1.37) | < 0.000001 |
| 45-54 | 1.18* (0.73-1.68) | < 0.000001 | 85+ | 0.94* (0.77-1.08) | < 0.000001 |
| **Hispanic or Latino** | | | | | |
| 15-24 | -0.89 (-1.97-0.04) | 0.060388 | 55-64 | 0.3 (-0.73-1.76) | 0.406719 |
| 25-34 | -0.07 (-1.47-1.54) | 0.981004 | 65-74 | 0.88* (0.1-1.99) | 0.033193 |
| 35-44 | -1.21 (-2.56-0.09) | 0.064387 | 75-84 | 0.92* (0.46-1.36) | 0.002 |
| 45-54 | 0.23 (-0.81-1.6) | 0.506699 | 85+ | 0.49 (-0.03-1.26) | 0.060788 |
| **Northeast region** | | | | | |
| 15-24 | -1.11* (-2.2--0.22) | 0.019596 | 55-64 | 0.47 (-0.4-1.27) | 0.223555 |
| 25-34 | 0.11 (-1.48-1.36) | 0.910618 | 65-74 | 0.26 (-0.24-0.8) | 0.253149 |
| 35-44 | -0.05 (-2-1.27) | 0.838632 | 75-84 | 0.54* (0.18-1.05) | 0.031994 |
| 45-54 | -0.87* (-1.67--0.21) | 0.015197 | 85+ | 0.65* (0.18-0.94) | 0.005599 |
| **Midwest region** | | | | | |
| 15-24 | - | - | 55-64 | 1.58* (0.89-2.16) | < 0.000001 |
| 25-34 | - | - | 65-74 | 1.34* (1-1.7) | < 0.000001 |
| 35-44 | 1.48* (0.35-2.77) | 0.013197 | 75-84 | 0.93* (0.77-1.14) | < 0.000001 |
| 45-54 | 1.78* (1-2.76) | < 0.000001 | 85+ | 0.92* (0.53-1.14) | < 0.000001 |
| **South region** | | | | | |
| 15-24 | 1.72* (0.71-2.99) | 0.0016 | 55-64 | 1.39* (0.99-1.9) | < 0.000001 |
| 25-34 | 0.46 (-0.62-1.64) | 0.359528 | 65-74 | 1.30* (1.07-1.6) | < 0.000001 |
| 35-44 | 1.45* (0.63-2.46) | 0.0016 | 75-84 | 1.40* (1-1.66) | < 0.000001 |
| 45-54 | 1.84* (1.15-2.75) | < 0.000001 | 85+ | 0.99* (0.69-1.22) | < 0.000001 |
| **West region** | | | | | |
| 15-24 | -0.61 (-2.07-0.57) | 0.223155 | 55-64 | 1.38* (1.02-1.86) | < 0.000001 |
| 25-34 | 1.37* (0.05-3.08) | 0.041192 | 65-74 | 1.23* (0.86-1.69) | < 0.000001 |
| 35-44 | 0.54 (-0.57-1.71) | 0.294341 | 75-84 | 1.26* (1.03-1.55) | < 0.000001 |
| 45-54 | 0.94* (0.16-1.83) | 0.019196 | 85+ | 0.70* (0.31-1.23) | 0.0024 |
| **Metropolitan area** | | | | | |
| 15-24 | 0.75 (-0.46-1.91) | 0.175165 | 55-64 | 1.21* (0.9-1.45) | < 0.000001 |
| 25-34 | 0.38 (-0.58-1.42) | 0.429114 | 65-74 | 1.24* (0.87-1.47) | < 0.000001 |
| 35-44 | 0.41 (-0.34-1.14) | 0.260748 | 75-84 | 1.17* (1-1.31) | < 0.000001 |
| 45-54 | 0.95* (0.55-1.42) | < 0.000001 | 85+ | 0.84* (0.59-1.02) | < 0.000001 |
| **Nonmetropolitan areas** | | | | | |
| 15-24 | - | - | 55-64 | 2.02* (1.35-2.49) | < 0.000001 |
| 25-34 | 1.57* (0.25-3.35) | 0.024395 | 65-74 | 1.28* (0.91-1.75) | < 0.000001 |
| 35-44 | 1.55* (0.51-2.83) | 0.005599 | 75-84 | 1.12* (0.72-1.39) | < 0.000001 |
| 45-54 | 0.83 (-0.13-1.88) | 0.078784 | 85+ | 1.04* (0.61-1.36) | < 0.000001 |
| AAPC = average annual percent change; N.H. = non-Hispanic; * Indicates that the average annual percentage change (AAPC) is significantly different from zero at α = 0.05. | | | | | |

| **Supplementary Table 3: CVD Burden in Leukemia and All Cause Deaths-Related Proportions across Age Groups 15-85+ in the Unites States, 1999-2020** | | | |
| --- | --- | --- | --- |
| **Year** | **CVD Burden in Leukemia Deaths (A/B)** | **CVD Burden in Leukemia Deaths (C/D)** | **Reporting Odds Ratio (95% CI)** |
| **15-24 Age Group** | | | |
| **1999** | 0.221 | 0.106 | 2.08 (1.695-2.551) |
| **2000** | 0.232 | 0.101 | 2.289 (1.864-2.811) |
| **2001** | 0.215 | 0.101 | 2.122 (1.725-2.611) |
| **2002** | 0.208 | 0.100 | 2.08 (1.679-2.577) |
| **2003** | 0.199 | 0.101 | 1.96 (1.553-2.474) |
| **2004** | 0.216 | 0.102 | 2.127 (1.712-2.642) |
| **2005** | 0.209 | 0.103 | 2.033 (1.641-2.519) |
| **2006** | 0.220 | 0.100 | 2.209 (1.792-2.724) |
| **2007** | 0.236 | 0.102 | 2.319 (1.88-2.86) |
| **2008** | 0.221 | 0.104 | 2.12 (1.698-2.646) |
| **2009** | 0.204 | 0.112 | 1.829 (1.446-2.312) |
| **2010** | 0.203 | 0.112 | 1.813 (1.43-2.298) |
| **2011** | 0.224 | 0.107 | 2.085 (1.66-2.618) |
| **2012** | 0.197 | 0.105 | 1.879 (1.468-2.406) |
| **2013** | 0.234 | 0.109 | 2.154 (1.705-2.721) |
| **2014** | 0.217 | 0.108 | 2.016 (1.59-2.556) |
| **2015** | 0.266 | 0.104 | 2.562 (2.047-3.208) |
| **2016** | 0.247 | 0.098 | 2.515 (2.005-3.153) |
| **2017** | 0.251 | 0.097 | 2.593 (2.044-3.29) |
| **2018** | 0.260 | 0.103 | 2.527 (2.008-3.18) |
| **2019** | 0.254 | 0.104 | 2.454 (1.929-3.123) |
| **2020** | 0.239 | 0.098 | 2.437 (1.88-3.158) |
| **25-34 Age Group** | | | |
| **1999** | 0.205 | 0.196 | 1.043 (0.851-1.279) |
| **2000** | 0.227 | 0.185 | 1.227 (1.002-1.504) |
| **2001** | 0.262 | 0.184 | 1.425 (1.182-1.717) |
| **2002** | 0.174 | 0.190 | 0.916 (0.729-1.152) |
| **2003** | 0.216 | 0.195 | 1.108 (0.893-1.376) |
| **2004** | 0.249 | 0.196 | 1.272 (1.03-1.572) |
| **2005** | 0.212 | 0.193 | 1.098 (0.887-1.36) |
| **2006** | 0.186 | 0.193 | 0.962 (0.768-1.205) |
| **2007** | 0.240 | 0.191 | 1.257 (1.021-1.547) |
| **2008** | 0.231 | 0.196 | 1.182 (0.969-1.443) |
| **2009** | 0.205 | 0.198 | 1.035 (0.835-1.282) |
| **2010** | 0.223 | 0.200 | 1.116 (0.902-1.38) |
| **2011** | 0.179 | 0.197 | 0.908 (0.717-1.149) |
| **2012** | 0.226 | 0.195 | 1.157 (0.932-1.436) |
| **2013** | 0.221 | 0.195 | 1.133 (0.907-1.417) |
| **2014** | 0.222 | 0.197 | 1.128 (0.91-1.399) |
| **2015** | 0.245 | 0.188 | 1.301 (1.057-1.601) |
| **2016** | 0.212 | 0.175 | 1.21 (0.972-1.506) |
| **2017** | 0.252 | 0.178 | 1.421 (1.146-1.762) |
| **2018** | 0.263 | 0.182 | 1.442 (1.168-1.781) |
| **2019** | 0.228 | 0.182 | 1.25 (0.997-1.567) |
| **2020** | 0.242 | 0.182 | 1.329 (1.064-1.66) |
| **35-44 Age Group** | | | |
| **1999** | 0.205 | 0.333 | 0.616 (0.524-0.724) |
| **2000** | 0.234 | 0.316 | 0.741 (0.636-0.863) |
| **2001** | 0.214 | 0.309 | 0.694 (0.591-0.815) |
| **2002** | 0.194 | 0.319 | 0.61 (0.515-0.722) |
| **2003** | 0.217 | 0.324 | 0.669 (0.57-0.784) |
| **2004** | 0.222 | 0.335 | 0.663 (0.561-0.783) |
| **2005** | 0.229 | 0.332 | 0.69 (0.584-0.816) |
| **2006** | 0.218 | 0.334 | 0.654 (0.553-0.773) |
| **2007** | 0.247 | 0.334 | 0.738 (0.626-0.87) |
| **2008** | 0.234 | 0.336 | 0.695 (0.585-0.826) |
| **2009** | 0.224 | 0.340 | 0.659 (0.557-0.78) |
| **2010** | 0.236 | 0.343 | 0.688 (0.578-0.819) |
| **2011** | 0.221 | 0.343 | 0.644 (0.537-0.773) |
| **2012** | 0.204 | 0.343 | 0.595 (0.492-0.72) |
| **2013** | 0.206 | 0.347 | 0.595 (0.493-0.718) |
| **2014** | 0.226 | 0.349 | 0.648 (0.54-0.779) |
| **2015** | 0.209 | 0.337 | 0.62 (0.508-0.758) |
| **2016** | 0.262 | 0.329 | 0.795 (0.668-0.946) |
| **2017** | 0.252 | 0.325 | 0.777 (0.648-0.931) |
| **2018** | 0.216 | 0.329 | 0.656 (0.541-0.795) |
| **2019** | 0.248 | 0.326 | 0.759 (0.634-0.91) |
| **2020** | 0.274 | 0.329 | 0.831 (0.702-0.983) |
| **45-54 Age Group** | | | |
| **1999** | 0.210 | 0.447 | 0.469 (0.416-0.53) |
| **2000** | 0.223 | 0.435 | 0.512 (0.456-0.575) |
| **2001** | 0.224 | 0.429 | 0.523 (0.467-0.586) |
| **2002** | 0.217 | 0.431 | 0.504 (0.448-0.566) |
| **2003** | 0.221 | 0.431 | 0.513 (0.455-0.578) |
| **2004** | 0.211 | 0.433 | 0.488 (0.432-0.551) |
| **2005** | 0.222 | 0.428 | 0.518 (0.461-0.582) |
| **2006** | 0.232 | 0.430 | 0.541 (0.482-0.607) |
| **2007** | 0.226 | 0.429 | 0.528 (0.469-0.593) |
| **2008** | 0.238 | 0.426 | 0.558 (0.499-0.624) |
| **2009** | 0.243 | 0.428 | 0.569 (0.509-0.636) |
| **2010** | 0.229 | 0.428 | 0.536 (0.477-0.602) |
| **2011** | 0.247 | 0.429 | 0.575 (0.515-0.642) |
| **2012** | 0.249 | 0.428 | 0.582 (0.518-0.655) |
| **2013** | 0.248 | 0.438 | 0.566 (0.503-0.636) |
| **2014** | 0.249 | 0.437 | 0.568 (0.506-0.638) |
| **2015** | 0.265 | 0.439 | 0.603 (0.536-0.678) |
| **2016** | 0.244 | 0.443 | 0.551 (0.487-0.624) |
| **2017** | 0.275 | 0.445 | 0.618 (0.548-0.697) |
| **2018** | 0.238 | 0.453 | 0.527 (0.463-0.6) |
| **2019** | 0.274 | 0.455 | 0.602 (0.531-0.682) |
| **2020** | 0.281 | 0.463 | 0.608 (0.538-0.687) |
| **55-64 Age Group** | | | |
| **1999** | 0.265 | 0.518 | 0.511 (0.472-0.554) |
| **2000** | 0.251 | 0.513 | 0.489 (0.45-0.532) |
| **2001** | 0.254 | 0.507 | 0.502 (0.462-0.544) |
| **2002** | 0.248 | 0.505 | 0.491 (0.453-0.532) |
| **2003** | 0.237 | 0.500 | 0.475 (0.437-0.516) |
| **2004** | 0.243 | 0.496 | 0.491 (0.453-0.532) |
| **2005** | 0.258 | 0.495 | 0.522 (0.482-0.565) |
| **2006** | 0.254 | 0.493 | 0.514 (0.475-0.555) |
| **2007** | 0.252 | 0.489 | 0.515 (0.477-0.557) |
| **2008** | 0.244 | 0.488 | 0.501 (0.464-0.541) |
| **2009** | 0.242 | 0.483 | 0.502 (0.465-0.542) |
| **2010** | 0.251 | 0.483 | 0.519 (0.481-0.559) |
| **2011** | 0.258 | 0.482 | 0.535 (0.496-0.576) |
| **2012** | 0.260 | 0.482 | 0.539 (0.501-0.581) |
| **2013** | 0.268 | 0.484 | 0.553 (0.514-0.595) |
| **2014** | 0.270 | 0.486 | 0.556 (0.517-0.599) |
| **2015** | 0.266 | 0.489 | 0.545 (0.505-0.587) |
| **2016** | 0.276 | 0.491 | 0.561 (0.522-0.604) |
| **2017** | 0.282 | 0.499 | 0.565 (0.525-0.608) |
| **2018** | 0.289 | 0.504 | 0.573 (0.533-0.617) |
| **2019** | 0.308 | 0.508 | 0.606 (0.564-0.651) |
| **2020** | 0.335 | 0.518 | 0.647 (0.604-0.693) |
| **65-74 Age Group** | | | |
| **1999** | 0.302 | 0.575 | 0.525 (0.498-0.553) |
| **2000** | 0.286 | 0.569 | 0.502 (0.475-0.53) |
| **2001** | 0.277 | 0.565 | 0.49 (0.464-0.519) |
| **2002** | 0.282 | 0.561 | 0.502 (0.475-0.531) |
| **2003** | 0.287 | 0.558 | 0.515 (0.487-0.544) |
| **2004** | 0.293 | 0.550 | 0.533 (0.504-0.563) |
| **2005** | 0.272 | 0.544 | 0.5 (0.472-0.529) |
| **2006** | 0.291 | 0.540 | 0.539 (0.509-0.569) |
| **2007** | 0.287 | 0.535 | 0.537 (0.508-0.569) |
| **2008** | 0.293 | 0.530 | 0.553 (0.523-0.584) |
| **2009** | 0.290 | 0.529 | 0.549 (0.52-0.579) |
| **2010** | 0.283 | 0.525 | 0.539 (0.51-0.569) |
| **2011** | 0.285 | 0.523 | 0.545 (0.517-0.576) |
| **2012** | 0.282 | 0.522 | 0.54 (0.512-0.57) |
| **2013** | 0.288 | 0.524 | 0.55 (0.522-0.579) |
| **2014** | 0.295 | 0.523 | 0.564 (0.536-0.594) |
| **2015** | 0.299 | 0.527 | 0.567 (0.539-0.597) |
| **2016** | 0.310 | 0.533 | 0.581 (0.553-0.611) |
| **2017** | 0.318 | 0.539 | 0.591 (0.562-0.621) |
| **2018** | 0.327 | 0.543 | 0.602 (0.574-0.632) |
| **2019** | 0.330 | 0.549 | 0.601 (0.573-0.63) |
| **2020** | 0.360 | 0.551 | 0.653 (0.624-0.683) |
| **75-84 Age Group** | | | |
| **1999** | 0.361 | 0.649 | 0.556 (0.533-0.58) |
| **2000** | 0.353 | 0.643 | 0.548 (0.526-0.572) |
| **2001** | 0.345 | 0.637 | 0.541 (0.518-0.565) |
| **2002** | 0.349 | 0.632 | 0.552 (0.529-0.576) |
| **2003** | 0.336 | 0.626 | 0.537 (0.515-0.561) |
| **2004** | 0.349 | 0.619 | 0.564 (0.541-0.589) |
| **2005** | 0.343 | 0.611 | 0.561 (0.537-0.585) |
| **2006** | 0.344 | 0.603 | 0.569 (0.546-0.594) |
| **2007** | 0.348 | 0.599 | 0.58 (0.557-0.605) |
| **2008** | 0.340 | 0.592 | 0.574 (0.55-0.599) |
| **2009** | 0.337 | 0.588 | 0.572 (0.548-0.598) |
| **2010** | 0.342 | 0.583 | 0.586 (0.561-0.611) |
| **2011** | 0.339 | 0.579 | 0.585 (0.561-0.611) |
| **2012** | 0.337 | 0.574 | 0.586 (0.562-0.612) |
| **2013** | 0.328 | 0.576 | 0.57 (0.546-0.595) |
| **2014** | 0.341 | 0.572 | 0.596 (0.572-0.622) |
| **2015** | 0.336 | 0.574 | 0.586 (0.561-0.611) |
| **2016** | 0.353 | 0.575 | 0.614 (0.588-0.64) |
| **2017** | 0.359 | 0.577 | 0.623 (0.598-0.649) |
| **2018** | 0.357 | 0.580 | 0.616 (0.591-0.642) |
| **2019** | 0.378 | 0.584 | 0.648 (0.623-0.675) |
| **2020** | 0.399 | 0.578 | 0.691 (0.666-0.717) |
| **85+ Age Group** | | | |
| **1999** | 0.448 | 0.716 | 0.625 (0.593-0.658) |
| **2000** | 0.448 | 0.712 | 0.63 (0.599-0.663) |
| **2001** | 0.421 | 0.705 | 0.597 (0.567-0.629) |
| **2002** | 0.436 | 0.699 | 0.623 (0.592-0.656) |
| **2003** | 0.444 | 0.692 | 0.641 (0.61-0.674) |
| **2004** | 0.425 | 0.687 | 0.619 (0.589-0.651) |
| **2005** | 0.432 | 0.677 | 0.638 (0.608-0.67) |
| **2006** | 0.420 | 0.671 | 0.626 (0.596-0.658) |
| **2007** | 0.431 | 0.666 | 0.647 (0.617-0.679) |
| **2008** | 0.402 | 0.657 | 0.612 (0.583-0.642) |
| **2009** | 0.408 | 0.653 | 0.625 (0.596-0.655) |
| **2010** | 0.412 | 0.647 | 0.637 (0.608-0.667) |
| **2011** | 0.409 | 0.639 | 0.64 (0.611-0.67) |
| **2012** | 0.418 | 0.635 | 0.658 (0.628-0.688) |
| **2013** | 0.417 | 0.633 | 0.658 (0.629-0.688) |
| **2014** | 0.414 | 0.632 | 0.654 (0.626-0.684) |
| **2015** | 0.409 | 0.634 | 0.645 (0.617-0.674) |
| **2016** | 0.419 | 0.634 | 0.661 (0.633-0.69) |
| **2017** | 0.416 | 0.636 | 0.654 (0.626-0.683) |
| **2018** | 0.426 | 0.638 | 0.668 (0.64-0.698) |
| **2019** | 0.439 | 0.641 | 0.684 (0.656-0.713) |
| **2020** | 0.470 | 0.628 | 0.75 (0.721-0.78) |

| **Supplementary Table 4:** CVD Burden in Leukemia-Related Reporting Odds Ratio Stratified by Sex and Urbanization in the Unites States, 1999-2020 | | | | |
| --- | --- | --- | --- | --- |
| **Reporting Odds Ratio (95% CI)** | | | | |
| **Year** | **Female** | **Male** | **Metropolitan Area** | **Non-Metropolitan Area** |
| **15-24 Age Group** | | | | |
| **1999** | 1.367 (0.983-1.903) | 2.569 (1.981-3.332) | 2.071 (1.663-2.578) | Suppressed |
| **2000** | 1.633 (1.169-2.282) | 2.672 (2.06-3.466) | 2.425 (1.951-3.014) | Suppressed |
| **2001** | 1.422 (1.011-2.001) | 2.559 (1.971-3.323) | 2.272 (1.824-2.831) | Suppressed |
| **2002** | 1.558 (1.114-2.178) | 2.348 (1.777-3.103) | 2.288 (1.826-2.866) | Suppressed |
| **2003** | 1.443 (0.977-2.132) | 2.251 (1.684-3.008) | 1.987 (1.545-2.554) | Suppressed |
| **2004** | 1.626 (1.149-2.302) | 2.387 (1.808-3.151) | 2.191 (1.74-2.76) | Suppressed |
| **2005** | 1.577 (1.119-2.222) | 2.247 (1.708-2.956) | 2.102 (1.667-2.652) | Suppressed |
| **2006** | 1.504 (1.059-2.136) | 2.624 (2.022-3.407) | 2.31 (1.849-2.887) | Suppressed |
| **2007** | 1.597 (1.141-2.235) | 2.756 (2.107-3.605) | 2.367 (1.892-2.962) | Suppressed |
| **2008** | 1.393 (0.943-2.056) | 2.558 (1.953-3.35) | 2.194 (1.739-2.768) | Suppressed |
| **2009** | 1.158 (0.754-1.777) | 2.251 (1.7-2.98) | 1.698 (1.304-2.212) | Suppressed |
| **2010** | 1.252 (0.839-1.868) | 2.164 (1.611-2.906) | 1.707 (1.31-2.223) | Suppressed |
| **2011** | 1.72 (1.216-2.433) | 2.213 (1.635-2.995) | 2.073 (1.628-2.639) | Suppressed |
| **2012** | 1.14 (0.75-1.733) | 2.428 (1.786-3.302) | 1.985 (1.529-2.577) | Suppressed |
| **2013** | 2.111 (1.499-2.973) | 2 (1.449-2.762) | 2.125 (1.655-2.727) | Suppressed |
| **2014** | 1.902 (1.338-2.705) | 1.923 (1.391-2.66) | 1.994 (1.541-2.581) | Suppressed |
| **2015** | 1.969 (1.349-2.875) | 2.879 (2.177-3.806) | 2.727 (2.146-3.466) | Suppressed |
| **2016** | 2.083 (1.435-3.025) | 2.7 (2.031-3.59) | 2.571 (2.021-3.271) | Suppressed |
| **2017** | 2.09 (1.416-3.085) | 2.83 (2.095-3.823) | 2.708 (2.111-3.475) | Suppressed |
| **2018** | 2.039 (1.402-2.966) | 2.761 (2.064-3.695) | 2.498 (1.954-3.195) | Suppressed |
| **2019** | 1.435 (0.95-2.167) | 3.229 (2.397-4.349) | 2.461 (1.898-3.191) | Suppressed |
| **2020** | 1.329 (0.847-2.085) | 3.303 (2.402-4.541) | 2.447 (1.85-3.235) | Suppressed |
| **25-34 Age Group** | | | | |
| **1999** | 0.841 (0.618-1.143) | 1.166 (0.888-1.532) | 1.07 (0.858-1.335) | 0.904 (0.53-1.54) |
| **2000** | 1.08 (0.791-1.477) | 1.294 (0.99-1.691) | 1.243 (1.001-1.542) | 1.108 (0.609-2.017) |
| **2001** | 1.009 (0.748-1.361) | 1.741 (1.372-2.21) | 1.5 (1.23-1.83) | 1.029 (0.599-1.766) |
| **2002** | 0.743 (0.518-1.066) | 1.021 (0.76-1.373) | 0.893 (0.695-1.148) | 1.045 (0.598-1.824) |
| **2003** | 0.95 (0.669-1.348) | 1.197 (0.909-1.576) | 1.199 (0.953-1.509) | 0.657 (0.339-1.273) |
| **2004** | 1.291 (0.956-1.742) | 1.164 (0.862-1.571) | 1.362 (1.09-1.702) | 0.778 (0.398-1.519) |
| **2005** | 0.918 (0.668-1.261) | 1.193 (0.894-1.594) | 1.13 (0.896-1.425) | 0.943 (0.543-1.639) |
| **2006** | 0.753 (0.527-1.075) | 1.096 (0.82-1.465) | 0.99 (0.779-1.26) | 0.8 (0.423-1.514) |
| **2007** | 1.239 (0.924-1.66) | 1.166 (0.867-1.568) | 1.271 (1.017-1.589) | 1.186 (0.674-2.086) |
| **2008** | 1.06 (0.775-1.449) | 1.23 (0.95-1.593) | 1.235 (1.001-1.525) | 0.864 (0.466-1.599) |
| **2009** | 0.968 (0.697-1.346) | 1.053 (0.794-1.397) | 1.106 (0.882-1.386) | 0.625 (0.312-1.252) |
| **2010** | 0.909 (0.65-1.272) | 1.247 (0.947-1.642) | 1.1 (0.875-1.382) | 1.229 (0.683-2.211) |
| **2011** | 0.792 (0.542-1.157) | 0.971 (0.718-1.313) | 0.878 (0.678-1.137) | 1.096 (0.613-1.961) |
| **2012** | 0.876 (0.614-1.249) | 1.353 (1.03-1.777) | 1.14 (0.898-1.448) | 1.236 (0.746-2.05) |
| **2013** | 0.957 (0.666-1.375) | 1.236 (0.931-1.641) | 1.116 (0.875-1.423) | 1.257 (0.711-2.223) |
| **2014** | 0.995 (0.713-1.389) | 1.195 (0.902-1.582) | 1.163 (0.925-1.462) | 0.948 (0.509-1.768) |
| **2015** | 1.072 (0.767-1.498) | 1.437 (1.102-1.872) | 1.28 (1.021-1.605) | 1.444 (0.852-2.447) |
| **2016** | 1.021 (0.73-1.427) | 1.311 (0.982-1.75) | 1.265 (1.002-1.597) | 0.925 (0.485-1.763) |
| **2017** | 1.076 (0.761-1.52) | 1.653 (1.256-2.176) | 1.437 (1.142-1.809) | 1.344 (0.73-2.476) |
| **2018** | 1.088 (0.784-1.511) | 1.692 (1.284-2.23) | 1.474 (1.175-1.85) | 1.279 (0.724-2.259) |
| **2019** | 1.071 (0.746-1.536) | 1.342 (1.004-1.794) | 1.277 (1-1.629) | 1.115 (0.61-2.039) |
| **2020** | 0.984 (0.688-1.407) | 1.562 (1.176-2.076) | 1.348 (1.06-1.714) | 1.239 (0.689-2.23) |
| **35-44 Age Group** | | | | |
| **1999** | 0.657 (0.521-0.83) | 0.582 (0.466-0.728) | 0.629 (0.529-0.748) | 0.546 (0.356-0.838) |
| **2000** | 0.784 (0.631-0.973) | 0.697 (0.562-0.865) | 0.788 (0.67-0.926) | 0.479 (0.299-0.769) |
| **2001** | 0.71 (0.56-0.901) | 0.679 (0.546-0.845) | 0.693 (0.581-0.826) | 0.704 (0.472-1.048) |
| **2002** | 0.614 (0.476-0.791) | 0.607 (0.484-0.761) | 0.63 (0.526-0.754) | 0.503 (0.313-0.808) |
| **2003** | 0.728 (0.578-0.918) | 0.624 (0.501-0.776) | 0.706 (0.595-0.838) | 0.486 (0.312-0.756) |
| **2004** | 0.697 (0.542-0.894) | 0.642 (0.513-0.802) | 0.685 (0.573-0.82) | 0.547 (0.346-0.863) |
| **2005** | 0.69 (0.54-0.882) | 0.696 (0.554-0.875) | 0.672 (0.558-0.81) | 0.775 (0.53-1.132) |
| **2006** | 0.715 (0.56-0.911) | 0.609 (0.483-0.767) | 0.683 (0.571-0.817) | 0.498 (0.31-0.802) |
| **2007** | 0.76 (0.594-0.973) | 0.725 (0.582-0.904) | 0.755 (0.632-0.903) | 0.648 (0.42-1) |
| **2008** | 0.71 (0.546-0.924) | 0.687 (0.546-0.863) | 0.711 (0.592-0.854) | 0.59 (0.35-0.994) |
| **2009** | 0.751 (0.589-0.957) | 0.593 (0.469-0.749) | 0.662 (0.552-0.794) | 0.639 (0.41-0.995) |
| **2010** | 0.772 (0.597-0.997) | 0.631 (0.497-0.801) | 0.706 (0.585-0.85) | 0.584 (0.356-0.956) |
| **2011** | 0.601 (0.454-0.796) | 0.685 (0.539-0.871) | 0.664 (0.546-0.808) | 0.537 (0.324-0.889) |
| **2012** | 0.641 (0.478-0.858) | 0.567 (0.44-0.729) | 0.608 (0.495-0.747) | 0.533 (0.322-0.883) |
| **2013** | 0.545 (0.406-0.731) | 0.638 (0.499-0.815) | 0.619 (0.506-0.757) | 0.465 (0.274-0.79) |
| **2014** | 0.733 (0.566-0.95) | 0.583 (0.45-0.756) | 0.645 (0.527-0.79) | 0.666 (0.429-1.032) |
| **2015** | 0.541 (0.397-0.739) | 0.691 (0.531-0.899) | 0.628 (0.506-0.778) | 0.587 (0.336-1.025) |
| **2016** | 0.787 (0.608-1.019) | 0.801 (0.633-1.014) | 0.807 (0.668-0.974) | 0.746 (0.475-1.172) |
| **2017** | 0.759 (0.577-0.999) | 0.79 (0.621-1.004) | 0.802 (0.661-0.974) | 0.655 (0.397-1.08) |
| **2018** | 0.688 (0.519-0.912) | 0.627 (0.482-0.816) | 0.644 (0.521-0.796) | 0.722 (0.456-1.143) |
| **2019** | 0.669 (0.503-0.89) | 0.828 (0.655-1.046) | 0.755 (0.619-0.921) | 0.784 (0.504-1.22) |
| **2020** | 0.686 (0.527-0.892) | 0.952 (0.765-1.185) | 0.819 (0.682-0.984) | 0.905 (0.595-1.376) |
| **45-54 Age Group** | | | | |
| **1999** | 0.471 (0.389-0.571) | 0.474 (0.406-0.554) | 0.465 (0.407-0.532) | 0.491 (0.37-0.651) |
| **2000** | 0.543 (0.455-0.648) | 0.499 (0.428-0.582) | 0.54 (0.477-0.612) | 0.37 (0.265-0.515) |
| **2001** | 0.577 (0.488-0.683) | 0.493 (0.422-0.576) | 0.539 (0.476-0.61) | 0.447 (0.333-0.598) |
| **2002** | 0.597 (0.502-0.709) | 0.449 (0.383-0.526) | 0.515 (0.453-0.585) | 0.455 (0.341-0.607) |
| **2003** | 0.553 (0.459-0.666) | 0.493 (0.422-0.576) | 0.525 (0.461-0.598) | 0.457 (0.34-0.614) |
| **2004** | 0.506 (0.419-0.611) | 0.482 (0.412-0.564) | 0.506 (0.444-0.576) | 0.4 (0.29-0.551) |
| **2005** | 0.518 (0.433-0.619) | 0.53 (0.454-0.618) | 0.518 (0.455-0.589) | 0.519 (0.393-0.684) |
| **2006** | 0.568 (0.475-0.679) | 0.529 (0.455-0.615) | 0.548 (0.483-0.621) | 0.506 (0.379-0.675) |
| **2007** | 0.538 (0.446-0.649) | 0.525 (0.452-0.611) | 0.544 (0.479-0.617) | 0.445 (0.325-0.611) |
| **2008** | 0.59 (0.498-0.7) | 0.543 (0.468-0.63) | 0.561 (0.496-0.634) | 0.542 (0.413-0.713) |
| **2009** | 0.573 (0.481-0.682) | 0.574 (0.497-0.663) | 0.559 (0.495-0.632) | 0.627 (0.477-0.824) |
| **2010** | 0.553 (0.463-0.66) | 0.532 (0.456-0.619) | 0.54 (0.476-0.613) | 0.516 (0.385-0.691) |
| **2011** | 0.626 (0.527-0.743) | 0.548 (0.474-0.634) | 0.598 (0.531-0.674) | 0.457 (0.337-0.619) |
| **2012** | 0.582 (0.483-0.7) | 0.589 (0.506-0.685) | 0.589 (0.519-0.669) | 0.55 (0.408-0.743) |
| **2013** | 0.562 (0.465-0.679) | 0.571 (0.491-0.665) | 0.605 (0.533-0.687) | 0.377 (0.27-0.527) |
| **2014** | 0.601 (0.501-0.722) | 0.551 (0.474-0.64) | 0.57 (0.502-0.647) | 0.563 (0.424-0.748) |
| **2015** | 0.599 (0.499-0.72) | 0.611 (0.525-0.711) | 0.623 (0.549-0.706) | 0.492 (0.353-0.684) |
| **2016** | 0.519 (0.427-0.631) | 0.582 (0.496-0.682) | 0.57 (0.499-0.651) | 0.462 (0.335-0.637) |
| **2017** | 0.677 (0.565-0.811) | 0.584 (0.497-0.686) | 0.631 (0.554-0.719) | 0.555 (0.406-0.757) |
| **2018** | 0.524 (0.429-0.641) | 0.535 (0.452-0.635) | 0.532 (0.462-0.612) | 0.503 (0.362-0.699) |
| **2019** | 0.583 (0.478-0.713) | 0.619 (0.528-0.727) | 0.613 (0.536-0.701) | 0.543 (0.388-0.76) |
| **2020** | 0.562 (0.461-0.685) | 0.644 (0.552-0.752) | 0.618 (0.541-0.705) | 0.561 (0.41-0.767) |
| **55-64 Age Group** | | | | |
| **1999** | 0.519 (0.456-0.591) | 0.506 (0.457-0.561) | 0.52 (0.476-0.568) | 0.476 (0.395-0.573) |
| **2000** | 0.472 (0.41-0.543) | 0.498 (0.448-0.553) | 0.498 (0.454-0.546) | 0.453 (0.371-0.552) |
| **2001** | 0.514 (0.449-0.588) | 0.492 (0.445-0.545) | 0.516 (0.472-0.564) | 0.439 (0.36-0.536) |
| **2002** | 0.521 (0.458-0.593) | 0.473 (0.426-0.524) | 0.495 (0.453-0.541) | 0.472 (0.388-0.573) |
| **2003** | 0.487 (0.425-0.559) | 0.466 (0.42-0.517) | 0.472 (0.43-0.517) | 0.488 (0.404-0.589) |
| **2004** | 0.502 (0.44-0.574) | 0.482 (0.436-0.533) | 0.495 (0.453-0.541) | 0.471 (0.389-0.57) |
| **2005** | 0.535 (0.469-0.61) | 0.513 (0.465-0.566) | 0.538 (0.493-0.587) | 0.455 (0.376-0.55) |
| **2006** | 0.515 (0.453-0.586) | 0.511 (0.464-0.563) | 0.521 (0.479-0.567) | 0.481 (0.4-0.579) |
| **2007** | 0.537 (0.472-0.61) | 0.502 (0.455-0.553) | 0.522 (0.48-0.569) | 0.484 (0.403-0.581) |
| **2008** | 0.522 (0.461-0.591) | 0.489 (0.444-0.539) | 0.498 (0.458-0.542) | 0.515 (0.43-0.617) |
| **2009** | 0.525 (0.463-0.596) | 0.488 (0.444-0.537) | 0.508 (0.467-0.553) | 0.476 (0.399-0.568) |
| **2010** | 0.584 (0.518-0.659) | 0.482 (0.438-0.531) | 0.53 (0.489-0.576) | 0.466 (0.387-0.56) |
| **2011** | 0.546 (0.483-0.618) | 0.527 (0.48-0.579) | 0.545 (0.502-0.592) | 0.488 (0.406-0.585) |
| **2012** | 0.569 (0.505-0.643) | 0.522 (0.475-0.574) | 0.544 (0.502-0.59) | 0.516 (0.431-0.618) |
| **2013** | 0.547 (0.484-0.618) | 0.557 (0.508-0.61) | 0.548 (0.505-0.594) | 0.578 (0.488-0.686) |
| **2014** | 0.575 (0.512-0.647) | 0.547 (0.498-0.601) | 0.572 (0.527-0.619) | 0.488 (0.407-0.586) |
| **2015** | 0.518 (0.455-0.591) | 0.556 (0.507-0.61) | 0.546 (0.503-0.594) | 0.539 (0.453-0.641) |
| **2016** | 0.536 (0.474-0.606) | 0.576 (0.526-0.631) | 0.563 (0.519-0.61) | 0.555 (0.467-0.658) |
| **2017** | 0.587 (0.522-0.66) | 0.553 (0.504-0.607) | 0.569 (0.525-0.617) | 0.548 (0.462-0.652) |
| **2018** | 0.597 (0.529-0.673) | 0.56 (0.511-0.614) | 0.576 (0.532-0.624) | 0.562 (0.472-0.668) |
| **2019** | 0.614 (0.546-0.691) | 0.601 (0.549-0.658) | 0.614 (0.567-0.665) | 0.57 (0.481-0.676) |
| **2020** | 0.689 (0.617-0.77) | 0.623 (0.572-0.68) | 0.635 (0.589-0.685) | 0.7 (0.599-0.818) |
| **65-74 Age Group** | | | | |
| **1999** | 0.497 (0.455-0.544) | 0.538 (0.504-0.575) | 0.531 (0.501-0.564) | 0.496 (0.438-0.561) |
| **2000** | 0.49 (0.447-0.536) | 0.506 (0.473-0.542) | 0.501 (0.471-0.533) | 0.504 (0.447-0.569) |
| **2001** | 0.484 (0.441-0.53) | 0.492 (0.459-0.528) | 0.498 (0.468-0.53) | 0.459 (0.403-0.523) |
| **2002** | 0.496 (0.452-0.545) | 0.502 (0.468-0.539) | 0.507 (0.477-0.539) | 0.481 (0.422-0.547) |
| **2003** | 0.515 (0.469-0.565) | 0.511 (0.476-0.548) | 0.523 (0.491-0.557) | 0.483 (0.426-0.547) |
| **2004** | 0.541 (0.494-0.593) | 0.525 (0.489-0.563) | 0.538 (0.506-0.573) | 0.511 (0.451-0.58) |
| **2005** | 0.484 (0.44-0.533) | 0.506 (0.471-0.543) | 0.501 (0.47-0.534) | 0.497 (0.437-0.565) |
| **2006** | 0.511 (0.466-0.561) | 0.551 (0.514-0.591) | 0.552 (0.519-0.587) | 0.488 (0.43-0.554) |
| **2007** | 0.507 (0.46-0.558) | 0.551 (0.513-0.591) | 0.544 (0.511-0.58) | 0.51 (0.448-0.58) |
| **2008** | 0.529 (0.482-0.581) | 0.562 (0.525-0.602) | 0.552 (0.519-0.587) | 0.557 (0.493-0.63) |
| **2009** | 0.564 (0.515-0.618) | 0.535 (0.5-0.573) | 0.541 (0.509-0.575) | 0.577 (0.513-0.65) |
| **2010** | 0.516 (0.47-0.567) | 0.547 (0.51-0.586) | 0.535 (0.503-0.57) | 0.552 (0.488-0.624) |
| **2011** | 0.518 (0.473-0.567) | 0.556 (0.52-0.595) | 0.549 (0.517-0.583) | 0.53 (0.469-0.599) |
| **2012** | 0.517 (0.472-0.566) | 0.548 (0.513-0.586) | 0.545 (0.513-0.578) | 0.522 (0.461-0.59) |
| **2013** | 0.531 (0.486-0.581) | 0.554 (0.52-0.591) | 0.552 (0.521-0.585) | 0.543 (0.482-0.61) |
| **2014** | 0.542 (0.496-0.592) | 0.57 (0.535-0.607) | 0.557 (0.526-0.59) | 0.595 (0.53-0.668) |
| **2015** | 0.526 (0.48-0.575) | 0.583 (0.547-0.62) | 0.571 (0.539-0.604) | 0.553 (0.492-0.622) |
| **2016** | 0.526 (0.482-0.573) | 0.606 (0.57-0.644) | 0.575 (0.544-0.607) | 0.612 (0.545-0.686) |
| **2017** | 0.558 (0.512-0.608) | 0.602 (0.566-0.639) | 0.598 (0.566-0.631) | 0.562 (0.5-0.632) |
| **2018** | 0.593 (0.547-0.643) | 0.602 (0.567-0.639) | 0.593 (0.562-0.626) | 0.64 (0.575-0.713) |
| **2019** | 0.581 (0.535-0.63) | 0.606 (0.571-0.644) | 0.602 (0.57-0.635) | 0.596 (0.535-0.665) |
| **2020** | 0.635 (0.589-0.686) | 0.657 (0.622-0.695) | 0.661 (0.629-0.695) | 0.62 (0.559-0.688) |
| **75-84 Age Group** | | | | |
| **1999** | 0.554 (0.52-0.591) | 0.558 (0.527-0.591) | 0.558 (0.532-0.585) | 0.548 (0.497-0.603) |
| **2000** | 0.532 (0.499-0.568) | 0.561 (0.531-0.594) | 0.548 (0.523-0.575) | 0.547 (0.499-0.6) |
| **2001** | 0.527 (0.494-0.563) | 0.552 (0.522-0.584) | 0.542 (0.517-0.568) | 0.537 (0.487-0.592) |
| **2002** | 0.532 (0.498-0.568) | 0.568 (0.538-0.601) | 0.554 (0.528-0.581) | 0.546 (0.496-0.601) |
| **2003** | 0.529 (0.496-0.565) | 0.543 (0.514-0.575) | 0.531 (0.506-0.557) | 0.563 (0.513-0.619) |
| **2004** | 0.54 (0.505-0.576) | 0.582 (0.551-0.615) | 0.557 (0.532-0.584) | 0.593 (0.54-0.652) |
| **2005** | 0.539 (0.504-0.576) | 0.576 (0.545-0.608) | 0.557 (0.531-0.584) | 0.575 (0.523-0.633) |
| **2006** | 0.561 (0.525-0.6) | 0.574 (0.543-0.606) | 0.561 (0.535-0.588) | 0.608 (0.552-0.669) |
| **2007** | 0.555 (0.518-0.593) | 0.597 (0.566-0.63) | 0.58 (0.553-0.607) | 0.584 (0.531-0.642) |
| **2008** | 0.552 (0.516-0.591) | 0.587 (0.556-0.621) | 0.569 (0.542-0.597) | 0.595 (0.54-0.655) |
| **2009** | 0.567 (0.53-0.607) | 0.575 (0.543-0.608) | 0.562 (0.535-0.589) | 0.618 (0.562-0.679) |
| **2010** | 0.542 (0.505-0.58) | 0.613 (0.58-0.646) | 0.59 (0.562-0.618) | 0.57 (0.518-0.628) |
| **2011** | 0.574 (0.537-0.614) | 0.59 (0.558-0.624) | 0.58 (0.553-0.609) | 0.604 (0.549-0.665) |
| **2012** | 0.574 (0.536-0.614) | 0.592 (0.56-0.625) | 0.583 (0.556-0.611) | 0.601 (0.546-0.662) |
| **2013** | 0.535 (0.499-0.573) | 0.59 (0.559-0.623) | 0.568 (0.542-0.596) | 0.576 (0.523-0.635) |
| **2014** | 0.563 (0.525-0.603) | 0.614 (0.582-0.647) | 0.593 (0.565-0.622) | 0.611 (0.556-0.672) |
| **2015** | 0.55 (0.512-0.591) | 0.604 (0.571-0.638) | 0.583 (0.555-0.612) | 0.597 (0.542-0.658) |
| **2016** | 0.608 (0.568-0.65) | 0.613 (0.581-0.647) | 0.603 (0.576-0.633) | 0.657 (0.598-0.722) |
| **2017** | 0.593 (0.554-0.634) | 0.637 (0.605-0.671) | 0.619 (0.591-0.648) | 0.638 (0.582-0.7) |
| **2018** | 0.587 (0.549-0.628) | 0.628 (0.597-0.661) | 0.617 (0.59-0.646) | 0.612 (0.556-0.672) |
| **2019** | 0.601 (0.561-0.643) | 0.67 (0.637-0.704) | 0.644 (0.616-0.673) | 0.668 (0.61-0.73) |
| **2020** | 0.65 (0.611-0.692) | 0.708 (0.676-0.741) | 0.69 (0.662-0.719) | 0.692 (0.637-0.753) |
| **85+ Age Group** | | | | |
| **1999** | 0.611 (0.57-0.654) | 0.653 (0.603-0.707) | 0.631 (0.595-0.669) | 0.604 (0.54-0.676) |
| **2000** | 0.639 (0.598-0.683) | 0.623 (0.576-0.675) | 0.62 (0.585-0.657) | 0.664 (0.598-0.738) |
| **2001** | 0.579 (0.54-0.62) | 0.63 (0.582-0.681) | 0.58 (0.547-0.616) | 0.659 (0.592-0.733) |
| **2002** | 0.644 (0.602-0.688) | 0.601 (0.556-0.65) | 0.623 (0.588-0.66) | 0.623 (0.56-0.693) |
| **2003** | 0.625 (0.585-0.668) | 0.667 (0.619-0.719) | 0.631 (0.597-0.668) | 0.68 (0.611-0.756) |
| **2004** | 0.624 (0.583-0.667) | 0.618 (0.572-0.667) | 0.632 (0.597-0.669) | 0.573 (0.512-0.641) |
| **2005** | 0.635 (0.594-0.678) | 0.646 (0.601-0.694) | 0.642 (0.607-0.678) | 0.625 (0.562-0.695) |
| **2006** | 0.623 (0.583-0.665) | 0.634 (0.589-0.682) | 0.628 (0.594-0.663) | 0.62 (0.555-0.692) |
| **2007** | 0.649 (0.608-0.693) | 0.647 (0.603-0.695) | 0.642 (0.608-0.677) | 0.667 (0.599-0.742) |
| **2008** | 0.612 (0.573-0.654) | 0.613 (0.571-0.658) | 0.605 (0.574-0.639) | 0.638 (0.573-0.709) |
| **2009** | 0.635 (0.595-0.678) | 0.614 (0.572-0.659) | 0.615 (0.583-0.648) | 0.669 (0.601-0.744) |
| **2010** | 0.639 (0.6-0.681) | 0.635 (0.593-0.68) | 0.63 (0.598-0.664) | 0.664 (0.599-0.736) |
| **2011** | 0.642 (0.603-0.684) | 0.638 (0.598-0.681) | 0.641 (0.609-0.674) | 0.637 (0.573-0.708) |
| **2012** | 0.647 (0.606-0.689) | 0.668 (0.626-0.712) | 0.654 (0.622-0.688) | 0.672 (0.605-0.746) |
| **2013** | 0.653 (0.613-0.696) | 0.661 (0.621-0.704) | 0.656 (0.625-0.69) | 0.664 (0.598-0.737) |
| **2014** | 0.635 (0.597-0.676) | 0.673 (0.632-0.716) | 0.648 (0.617-0.68) | 0.683 (0.618-0.755) |
| **2015** | 0.648 (0.608-0.69) | 0.641 (0.601-0.682) | 0.638 (0.607-0.671) | 0.674 (0.608-0.748) |
| **2016** | 0.662 (0.622-0.704) | 0.658 (0.619-0.7) | 0.658 (0.627-0.69) | 0.674 (0.609-0.746) |
| **2017** | 0.647 (0.609-0.688) | 0.658 (0.619-0.699) | 0.645 (0.615-0.677) | 0.696 (0.629-0.77) |
| **2018** | 0.66 (0.62-0.702) | 0.673 (0.634-0.714) | 0.652 (0.622-0.684) | 0.743 (0.673-0.821) |
| **2019** | 0.671 (0.632-0.713) | 0.694 (0.654-0.736) | 0.672 (0.641-0.704) | 0.74 (0.672-0.815) |
| **2020** | 0.732 (0.692-0.775) | 0.761 (0.721-0.804) | 0.742 (0.71-0.775) | 0.785 (0.716-0.861) |

| **Supplementary Table 5:** CVD Burden in Leukemia-Related Reporting Odds Ratio Stratified by Census Regions in the Unites States, 1999-2020 | | | | | |
| --- | --- | --- | --- | --- | --- |
| **Reporting Odds Ratio (95% CI)** | | | | | |
| **Year** | **Northeast** | **Midwest** | **South** | **West** | |
| **15-24 Age Group** | | | | | |
| **1999** | 2.37 (1.83-3.06) | Suppressed | 1.41 (0.93-2.12) | 2.89 (2.05-4.09) | |
| **2000** | 2.6 (2.02-3.34) | Suppressed | 2.11 (1.48-2.99) | 2.65 (1.8-3.89) | |
| **2001** | 2.4 (1.84-3.12) | Suppressed | 1.63 (1.11-2.39) | 2.62 (1.74-3.93) | |
| **2002** | 2.22 (1.71-2.88) | Suppressed | 1.65 (1.13-2.4) | 2.67 (1.81-3.95) | |
| **2003** | 2.18 (1.66-2.88) | Suppressed | 1.64 (1.09-2.48) | 2.57 (1.71-3.86) | |
| **2004** | 2.53 (1.97-3.23) | Suppressed | 2.12 (1.51-2.98) | 2.4 (1.57-3.67) | |
| **2005** | 2.17 (1.68-2.81) | Suppressed | 1.79 (1.23-2.6) | 2.52 (1.73-3.67) | |
| **2006** | 1.69 (1.26-2.28) | Suppressed | 2.24 (1.57-3.2) | 3.03 (2.13-4.3) | |
| **2007** | 2.51 (1.95-3.25) | Suppressed | 2.25 (1.56-3.27) | 2.83 (1.98-4.04) | |
| **2008** | 1.96 (1.49-2.57) | Suppressed | 1.94 (1.35-2.8) | 2.31 (1.54-3.48) | |
| **2009** | 1.94 (1.48-2.56) | Suppressed | 1.57 (1.04-2.37) | 2.22 (1.47-3.36) | |
| **2010** | 1.85 (1.39-2.45) | Suppressed | 1.82 (1.23-2.69) | 1.92 (1.26-2.91) | |
| **2011** | 1.62 (1.19-2.2) | Suppressed | 1.76 (1.18-2.63) | 2.37 (1.61-3.51) | |
| **2012** | 1.83 (1.34-2.51) | Suppressed | 1.68 (1.12-2.52) | 2.16 (1.39-3.34) | |
| **2013** | 1.78 (1.3-2.43) | Suppressed | 2.18 (1.49-3.21) | 2 (1.29-3.12) | |
| **2014** | 1.81 (1.34-2.44) | Suppressed | 2.22 (1.53-3.2) | 1.53 (0.95-2.47) | |
| **2015** | 2.09 (1.55-2.82) | Suppressed | 2.59 (1.77-3.8) | 3.27 (2.26-4.75) | |
| **2016** | 1.63 (1.15-2.32) | Suppressed | 2.5 (1.75-3.57) | 3.18 (2.18-4.62) | |
| **2017** | 2.55 (1.87-3.49) | Suppressed | 2.12 (1.43-3.14) | 3.78 (2.57-5.56) | |
| **2018** | 1.9 (1.38-2.6) | Suppressed | 2.65 (1.87-3.76) | 2.32 (1.46-3.69) | |
| **2019** | 2.03 (1.5-2.73) | Suppressed | 2.4 (1.63-3.53) | 2.81 (1.82-4.34) | |
| **2020** | 1.99 (1.46-2.71) | Suppressed | 2.4 (1.62-3.57) | 2.8 (1.67-4.68) | |
| **25-34 Age Group** | | | | | |
| **1999** | 1.47 (1-2.16) | Suppressed | 0.86 (0.59-1.26) | 0.98 (0.63-1.52) | |
| **2000** | 1.86 (1.28-2.7) | Suppressed | 1.13 (0.81-1.6) | 1.05 (0.66-1.67) | |
| **2001** | 1.9 (1.28-2.83) | Suppressed | 1.18 (0.86-1.63) | 1.59 (1.1-2.31) | |
| **2002** | 1.29 (0.8-2.09) | Suppressed | 0.84 (0.58-1.23) | 1.12 (0.71-1.76) | |
| **2003** | 1.87 (1.21-2.91) | Suppressed | 0.96 (0.66-1.39) | 1.21 (0.77-1.89) | |
| **2004** | 1.8 (1.17-2.76) | Suppressed | 0.93 (0.61-1.4) | 1.62 (1.11-2.36) | |
| **2005** | 1.33 (0.83-2.14) | Suppressed | 1.22 (0.87-1.69) | 1.18 (0.77-1.81) | |
| **2006** | 1.18 (0.72-1.94) | Suppressed | 1.06 (0.74-1.52) | 0.91 (0.58-1.42) | |
| **2007** | 1.41 (0.88-2.25) | Suppressed | 1.25 (0.89-1.75) | 1.42 (0.95-2.12) | |
| **2008** | 1.49 (1-2.22) | Suppressed | 1.11 (0.78-1.58) | 1.4 (0.97-2.02) | |
| **2009** | 1.49 (0.95-2.34) | Suppressed | 0.94 (0.66-1.34) | 0.99 (0.65-1.5) | |
| **2010** | 1.51 (0.97-2.35) | Suppressed | 0.95 (0.66-1.36) | 1.26 (0.83-1.92) | |
| **2011** | 1.39 (0.87-2.22) | Suppressed | 0.79 (0.52-1.18) | 0.93 (0.59-1.47) | |
| **2012** | 1.58 (0.97-2.59) | Suppressed | 1.07 (0.75-1.53) | 1.48 (1.02-2.15) | |
| **2013** | 1.4 (0.79-2.47) | Suppressed | 1.03 (0.73-1.46) | 1.21 (0.79-1.84) | |
| **2014** | 1.4 (0.81-2.44) | Suppressed | 0.92 (0.64-1.32) | 1.28 (0.89-1.85) | |
| **2015** | 1.55 (0.93-2.57) | Suppressed | 1.31 (0.95-1.81) | 1.33 (0.9-1.97) | |
| **2016** | 1.4 (0.8-2.44) | Suppressed | 1.08 (0.77-1.53) | 1.75 (1.19-2.57) | |
| **2017** | 1.67 (0.96-2.89) | Suppressed | 0.95 (0.63-1.42) | 1.86 (1.29-2.66) | |
| **2018** | 1.69 (1.02-2.81) | Suppressed | 1.27 (0.9-1.79) | 1.85 (1.28-2.67) | |
| **2019** | 1.93 (1.18-3.15) | Suppressed | 1.06 (0.73-1.53) | 1.29 (0.83-2.01) | |
| **2020** | 1.55 (0.87-2.74) | Suppressed | 1.21 (0.84-1.74) | 1.4 (0.92-2.13) | |
| **35-44 Age Group** | | | | | |
| **1999** | 0.87 (0.65-1.17) | 0.49 (0.33-0.72) | 0.49 (0.36-0.65) | 0.69 (0.49-0.96) | |
| **2000** | 1.25 (0.95-1.65) | 0.39 (0.25-0.59) | 0.59 (0.44-0.78) | 0.86 (0.64-1.17) | |
| **2001** | 1.14 (0.83-1.55) | 0.42 (0.28-0.63) | 0.62 (0.47-0.81) | 0.78 (0.56-1.1) | |
| **2002** | 0.7 (0.5-0.99) | 0.36 (0.23-0.56) | 0.6 (0.45-0.8) | 0.79 (0.57-1.1) | |
| **2003** | 0.99 (0.73-1.35) | 0.51 (0.35-0.74) | 0.6 (0.46-0.79) | 0.66 (0.46-0.94) | |
| **2004** | 0.84 (0.6-1.18) | 0.42 (0.27-0.67) | 0.64 (0.49-0.85) | 0.74 (0.54-1.04) | |
| **2005** | 1.05 (0.77-1.44) | 0.54 (0.35-0.81) | 0.56 (0.42-0.76) | 0.7 (0.49-0.99) | |
| **2006** | 0.89 (0.63-1.26) | 0.54 (0.36-0.8) | 0.59 (0.45-0.78) | 0.68 (0.48-0.96) | |
| **2007** | 0.87 (0.62-1.23) | 0.52 (0.34-0.79) | 0.72 (0.55-0.94) | 0.84 (0.6-1.17) | |
| **2008** | 0.83 (0.58-1.19) | 0.7 (0.47-1.05) | 0.64 (0.48-0.85) | 0.66 (0.46-0.95) | |
| **2009** | 0.72 (0.49-1.06) | 0.55 (0.37-0.82) | 0.62 (0.47-0.81) | 0.78 (0.55-1.1) | |
| **2010** | 0.78 (0.53-1.14) | 0.53 (0.33-0.86) | 0.6 (0.44-0.8) | 0.85 (0.62-1.17) | |
| **2011** | 0.8 (0.54-1.19) | 0.44 (0.26-0.76) | 0.48 (0.35-0.66) | 0.91 (0.67-1.25) | |
| **2012** | 0.88 (0.59-1.31) | 0.47 (0.28-0.76) | 0.57 (0.42-0.77) | 0.54 (0.36-0.82) | |
| **2013** | 0.61 (0.4-0.95) | 0.5 (0.31-0.79) | 0.57 (0.41-0.79) | 0.69 (0.49-0.96) | |
| **2014** | 0.79 (0.5-1.25) | 0.59 (0.37-0.92) | 0.53 (0.39-0.72) | 0.82 (0.59-1.15) | |
| **2015** | 0.4 (0.21-0.75) | 0.35 (0.19-0.64) | 0.7 (0.52-0.95) | 0.81 (0.57-1.15) | |
| **2016** | 1.17 (0.8-1.72) | 0.65 (0.41-1.01) | 0.65 (0.48-0.88) | 0.9 (0.65-1.25) | |
| **2017** | 0.8 (0.49-1.3) | 0.68 (0.44-1.04) | 0.82 (0.62-1.07) | 0.77 (0.53-1.12) | |
| **2018** | 0.81 (0.51-1.31) | 0.58 (0.35-0.94) | 0.65 (0.49-0.87) | 0.63 (0.42-0.94) | |
| **2019** | 0.7 (0.41-1.18) | 0.6 (0.39-0.94) | 0.86 (0.66-1.12) | 0.73 (0.51-1.06) | |
| **2020** | 1.19 (0.84-1.71) | 0.56 (0.35-0.91) | 0.73 (0.56-0.96) | 0.97 (0.69-1.36) | |
| **45-54 Age Group** | | | | | |
| **1999** | 0.64 (0.51-0.81) | 0.39 (0.3-0.51) | 0.39 (0.31-0.49) | 0.52 (0.4-0.67) | |
| **2000** | 0.8 (0.64-0.99) | 0.41 (0.32-0.53) | 0.37 (0.3-0.46) | 0.61 (0.47-0.78) | |
| **2001** | 0.71 (0.57-0.88) | 0.35 (0.26-0.47) | 0.47 (0.39-0.57) | 0.62 (0.49-0.79) | |
| **2002** | 0.69 (0.55-0.87) | 0.43 (0.33-0.56) | 0.42 (0.34-0.51) | 0.56 (0.43-0.71) | |
| **2003** | 0.72 (0.57-0.92) | 0.34 (0.25-0.46) | 0.44 (0.36-0.55) | 0.62 (0.49-0.78) | |
| **2004** | 0.67 (0.53-0.85) | 0.35 (0.26-0.47) | 0.4 (0.32-0.5) | 0.62 (0.48-0.79) | |
| **2005** | 0.71 (0.56-0.91) | 0.39 (0.3-0.52) | 0.48 (0.4-0.59) | 0.54 (0.42-0.69) | |
| **2006** | 0.73 (0.58-0.92) | 0.47 (0.36-0.61) | 0.46 (0.38-0.56) | 0.59 (0.46-0.75) | |
| **2007** | 0.64 (0.49-0.82) | 0.4 (0.3-0.54) | 0.49 (0.41-0.6) | 0.61 (0.48-0.77) | |
| **2008** | 0.79 (0.63-0.98) | 0.43 (0.33-0.56) | 0.46 (0.37-0.56) | 0.64 (0.51-0.81) | |
| **2009** | 0.67 (0.52-0.85) | 0.36 (0.27-0.48) | 0.6 (0.5-0.71) | 0.63 (0.5-0.79) | |
| **2010** | 0.64 (0.5-0.82) | 0.46 (0.35-0.6) | 0.46 (0.37-0.56) | 0.66 (0.52-0.83) | |
| **2011** | 0.61 (0.47-0.78) | 0.52 (0.41-0.68) | 0.52 (0.43-0.62) | 0.69 (0.56-0.86) | |
| **2012** | 0.57 (0.43-0.75) | 0.37 (0.27-0.5) | 0.58 (0.48-0.7) | 0.83 (0.66-1.04) | |
| **2013** | 0.6 (0.45-0.8) | 0.47 (0.36-0.62) | 0.62 (0.51-0.74) | 0.55 (0.43-0.71) | |
| **2014** | 0.63 (0.48-0.83) | 0.47 (0.36-0.62) | 0.55 (0.46-0.66) | 0.64 (0.5-0.81) | |
| **2015** | 0.64 (0.49-0.85) | 0.57 (0.44-0.73) | 0.6 (0.5-0.73) | 0.61 (0.48-0.78) | |
| **2016** | 0.62 (0.46-0.84) | 0.47 (0.35-0.62) | 0.5 (0.41-0.62) | 0.67 (0.53-0.85) | |
| **2017** | 0.65 (0.48-0.87) | 0.49 (0.36-0.66) | 0.58 (0.48-0.7) | 0.78 (0.62-0.99) | |
| **2018** | 0.43 (0.3-0.62) | 0.5 (0.37-0.66) | 0.55 (0.46-0.68) | 0.57 (0.44-0.75) | |
| **2019** | 0.74 (0.55-0.99) | 0.58 (0.43-0.77) | 0.57 (0.47-0.69) | 0.59 (0.46-0.77) | |
| **2020** | 0.55 (0.4-0.77) | 0.52 (0.39-0.69) | 0.62 (0.51-0.74) | 0.7 (0.55-0.9) | |
| **55-64 Age Group** | | | | | |
| **1999** | 0.62 (0.52-0.73) | 0.43 (0.36-0.51) | 0.49 (0.43-0.56) | 0.54 (0.45-0.64) | |
| **2000** | 0.62 (0.52-0.73) | 0.43 (0.36-0.52) | 0.44 (0.38-0.51) | 0.51 (0.42-0.62) | |
| **2001** | 0.65 (0.55-0.77) | 0.45 (0.37-0.54) | 0.43 (0.37-0.49) | 0.55 (0.46-0.66) | |
| **2002** | 0.6 (0.51-0.71) | 0.4 (0.33-0.48) | 0.46 (0.4-0.52) | 0.55 (0.46-0.65) | |
| **2003** | 0.58 (0.49-0.69) | 0.45 (0.38-0.54) | 0.4 (0.34-0.46) | 0.54 (0.45-0.65) | |
| **2004** | 0.57 (0.49-0.68) | 0.41 (0.34-0.49) | 0.44 (0.39-0.51) | 0.59 (0.5-0.7) | |
| **2005** | 0.72 (0.61-0.83) | 0.38 (0.32-0.46) | 0.52 (0.45-0.59) | 0.5 (0.42-0.6) | |
| **2006** | 0.65 (0.56-0.77) | 0.43 (0.36-0.51) | 0.48 (0.42-0.55) | 0.53 (0.44-0.62) | |
| **2007** | 0.59 (0.5-0.7) | 0.47 (0.4-0.56) | 0.48 (0.42-0.55) | 0.55 (0.47-0.65) | |
| **2008** | 0.6 (0.52-0.71) | 0.44 (0.37-0.52) | 0.45 (0.39-0.51) | 0.56 (0.47-0.65) | |
| **2009** | 0.59 (0.5-0.7) | 0.49 (0.42-0.57) | 0.44 (0.39-0.5) | 0.55 (0.47-0.65) | |
| **2010** | 0.54 (0.45-0.64) | 0.43 (0.37-0.51) | 0.53 (0.47-0.6) | 0.57 (0.49-0.67) | |
| **2011** | 0.56 (0.48-0.66) | 0.48 (0.41-0.56) | 0.51 (0.45-0.58) | 0.61 (0.53-0.72) | |
| **2012** | 0.62 (0.53-0.74) | 0.46 (0.39-0.55) | 0.5 (0.44-0.56) | 0.62 (0.53-0.72) | |
| **2013** | 0.59 (0.5-0.69) | 0.5 (0.43-0.59) | 0.53 (0.47-0.6) | 0.62 (0.54-0.72) | |
| **2014** | 0.54 (0.45-0.65) | 0.44 (0.37-0.53) | 0.57 (0.5-0.64) | 0.65 (0.57-0.76) | |
| **2015** | 0.55 (0.46-0.65) | 0.47 (0.4-0.56) | 0.52 (0.46-0.59) | 0.66 (0.56-0.77) | |
| **2016** | 0.68 (0.58-0.79) | 0.5 (0.42-0.58) | 0.53 (0.47-0.59) | 0.59 (0.51-0.69) | |
| **2017** | 0.67 (0.57-0.79) | 0.47 (0.4-0.55) | 0.54 (0.48-0.6) | 0.64 (0.55-0.75) | |
| **2018** | 0.61 (0.51-0.72) | 0.51 (0.43-0.6) | 0.55 (0.49-0.61) | 0.66 (0.57-0.77) | |
| **2019** | 0.69 (0.58-0.81) | 0.54 (0.46-0.64) | 0.57 (0.5-0.64) | 0.68 (0.59-0.79) | |
| **2020** | 0.7 (0.6-0.82) | 0.59 (0.51-0.68) | 0.63 (0.56-0.7) | 0.71 (0.61-0.82) | |
| **65-74 Age Group** | | | | | |
| **1999** | 0.66 (0.59-0.73) | 0.44 (0.39-0.49) | 0.47 (0.43-0.52) | 0.58 (0.51-0.65) | |
| **2000** | 0.59 (0.52-0.65) | 0.48 (0.43-0.53) | 0.47 (0.43-0.51) | 0.51 (0.45-0.58) | |
| **2001** | 0.57 (0.5-0.64) | 0.42 (0.37-0.47) | 0.46 (0.42-0.51) | 0.55 (0.49-0.62) | |
| **2002** | 0.58 (0.52-0.65) | 0.48 (0.43-0.54) | 0.46 (0.42-0.5) | 0.53 (0.46-0.6) | |
| **2003** | 0.6 (0.53-0.67) | 0.49 (0.44-0.55) | 0.47 (0.42-0.52) | 0.54 (0.48-0.62) | |
| **2004** | 0.62 (0.55-0.7) | 0.52 (0.46-0.58) | 0.46 (0.42-0.51) | 0.59 (0.52-0.66) | |
| **2005** | 0.59 (0.52-0.67) | 0.47 (0.41-0.53) | 0.46 (0.42-0.51) | 0.51 (0.45-0.58) | |
| **2006** | 0.61 (0.54-0.69) | 0.49 (0.44-0.55) | 0.52 (0.48-0.57) | 0.55 (0.49-0.63) | |
| **2007** | 0.64 (0.57-0.72) | 0.49 (0.43-0.55) | 0.49 (0.44-0.54) | 0.58 (0.51-0.66) | |
| **2008** | 0.65 (0.58-0.74) | 0.49 (0.44-0.56) | 0.53 (0.48-0.58) | 0.58 (0.51-0.65) | |
| **2009** | 0.64 (0.57-0.72) | 0.51 (0.45-0.57) | 0.52 (0.47-0.57) | 0.56 (0.5-0.63) | |
| **2010** | 0.62 (0.55-0.7) | 0.49 (0.44-0.56) | 0.51 (0.47-0.56) | 0.56 (0.5-0.64) | |
| **2011** | 0.57 (0.51-0.65) | 0.5 (0.44-0.56) | 0.53 (0.48-0.58) | 0.61 (0.54-0.68) | |
| **2012** | 0.64 (0.57-0.72) | 0.49 (0.43-0.55) | 0.5 (0.46-0.55) | 0.58 (0.52-0.65) | |
| **2013** | 0.57 (0.51-0.65) | 0.46 (0.41-0.52) | 0.57 (0.52-0.62) | 0.59 (0.53-0.66) | |
| **2014** | 0.61 (0.54-0.69) | 0.5 (0.45-0.57) | 0.54 (0.49-0.58) | 0.63 (0.57-0.7) | |
| **2015** | 0.6 (0.54-0.68) | 0.49 (0.44-0.55) | 0.55 (0.5-0.6) | 0.64 (0.58-0.72) | |
| **2016** | 0.65 (0.58-0.73) | 0.53 (0.48-0.6) | 0.54 (0.49-0.58) | 0.65 (0.58-0.72) | |
| **2017** | 0.59 (0.52-0.66) | 0.53 (0.47-0.59) | 0.58 (0.54-0.63) | 0.67 (0.6-0.74) | |
| **2018** | 0.63 (0.56-0.7) | 0.58 (0.53-0.65) | 0.57 (0.53-0.62) | 0.65 (0.59-0.72) | |
| **2019** | 0.59 (0.53-0.66) | 0.57 (0.52-0.64) | 0.58 (0.54-0.63) | 0.67 (0.6-0.74) | |
| **2020** | 0.71 (0.64-0.79) | 0.63 (0.57-0.69) | 0.6 (0.56-0.65) | 0.72 (0.66-0.79) | |
| **75-84 Age Group** | | | | | |
| **1999** | 0.63 (0.57-0.68) | 0.54 (0.5-0.59) | 0.51 (0.47-0.55) | 0.58 (0.53-0.63) | |
| **2000** | 0.61 (0.56-0.66) | 0.53 (0.49-0.58) | 0.53 (0.49-0.57) | 0.54 (0.49-0.59) | |
| **2001** | 0.64 (0.58-0.69) | 0.51 (0.47-0.55) | 0.49 (0.46-0.53) | 0.57 (0.52-0.63) | |
| **2002** | 0.66 (0.6-0.71) | 0.52 (0.48-0.57) | 0.51 (0.48-0.55) | 0.55 (0.5-0.61) | |
| **2003** | 0.61 (0.56-0.67) | 0.51 (0.46-0.55) | 0.51 (0.47-0.55) | 0.54 (0.49-0.6) | |
| **2004** | 0.61 (0.56-0.67) | 0.52 (0.48-0.57) | 0.55 (0.51-0.59) | 0.59 (0.54-0.65) | |
| **2005** | 0.62 (0.57-0.68) | 0.54 (0.49-0.59) | 0.53 (0.49-0.57) | 0.59 (0.53-0.65) | |
| **2006** | 0.64 (0.59-0.7) | 0.53 (0.49-0.58) | 0.55 (0.51-0.59) | 0.57 (0.51-0.62) | |
| **2007** | 0.65 (0.6-0.71) | 0.53 (0.49-0.58) | 0.55 (0.51-0.59) | 0.62 (0.56-0.68) | |
| **2008** | 0.65 (0.59-0.71) | 0.56 (0.51-0.61) | 0.53 (0.49-0.57) | 0.59 (0.54-0.65) | |
| **2009** | 0.64 (0.58-0.7) | 0.55 (0.5-0.6) | 0.53 (0.49-0.57) | 0.6 (0.55-0.66) | |
| **2010** | 0.66 (0.6-0.72) | 0.53 (0.48-0.58) | 0.56 (0.52-0.61) | 0.61 (0.56-0.67) | |
| **2011** | 0.6 (0.55-0.66) | 0.56 (0.51-0.61) | 0.55 (0.51-0.59) | 0.65 (0.6-0.71) | |
| **2012** | 0.6 (0.55-0.66) | 0.56 (0.51-0.61) | 0.57 (0.53-0.61) | 0.64 (0.58-0.7) | |
| **2013** | 0.57 (0.52-0.63) | 0.56 (0.51-0.61) | 0.53 (0.49-0.57) | 0.65 (0.59-0.71) | |
| **2014** | 0.62 (0.57-0.69) | 0.56 (0.51-0.61) | 0.57 (0.53-0.61) | 0.66 (0.6-0.72) | |
| **2015** | 0.61 (0.55-0.67) | 0.58 (0.53-0.63) | 0.54 (0.5-0.58) | 0.65 (0.59-0.71) | |
| **2016** | 0.65 (0.59-0.71) | 0.57 (0.52-0.63) | 0.6 (0.56-0.64) | 0.65 (0.59-0.71) | |
| **2017** | 0.65 (0.59-0.72) | 0.59 (0.54-0.64) | 0.6 (0.56-0.64) | 0.68 (0.62-0.74) | |
| **2018** | 0.63 (0.57-0.69) | 0.59 (0.54-0.64) | 0.58 (0.54-0.62) | 0.7 (0.64-0.76) | |
| **2019** | 0.65 (0.6-0.72) | 0.62 (0.57-0.68) | 0.63 (0.59-0.68) | 0.69 (0.64-0.76) | |
| **2020** | 0.71 (0.65-0.78) | 0.66 (0.61-0.71) | 0.68 (0.64-0.72) | 0.73 (0.67-0.79) | |
| **85+ Age Group** | | | | |
| **1999** | 0.69 (0.62-0.76) | 0.6 (0.55-0.67) | 0.58 (0.53-0.64) | 0.66 (0.59-0.74) | |
| **2000** | 0.69 (0.62-0.77) | 0.64 (0.58-0.71) | 0.59 (0.54-0.65) | 0.62 (0.56-0.7) | |
| **2001** | 0.64 (0.57-0.71) | 0.6 (0.54-0.66) | 0.56 (0.51-0.62) | 0.6 (0.53-0.68) | |
| **2002** | 0.68 (0.61-0.75) | 0.6 (0.54-0.66) | 0.57 (0.52-0.63) | 0.68 (0.6-0.76) | |
| **2003** | 0.65 (0.59-0.73) | 0.63 (0.57-0.69) | 0.62 (0.56-0.68) | 0.68 (0.61-0.76) | |
| **2004** | 0.64 (0.58-0.72) | 0.62 (0.56-0.69) | 0.58 (0.52-0.63) | 0.66 (0.59-0.74) | |
| **2005** | 0.7 (0.63-0.77) | 0.62 (0.57-0.69) | 0.6 (0.55-0.66) | 0.65 (0.58-0.73) | |
| **2006** | 0.62 (0.56-0.69) | 0.61 (0.56-0.67) | 0.62 (0.57-0.67) | 0.67 (0.6-0.74) | |
| **2007** | 0.71 (0.64-0.79) | 0.63 (0.57-0.69) | 0.6 (0.55-0.65) | 0.67 (0.61-0.75) | |
| **2008** | 0.66 (0.59-0.73) | 0.61 (0.56-0.67) | 0.57 (0.52-0.62) | 0.63 (0.57-0.7) | |
| **2009** | 0.67 (0.6-0.74) | 0.62 (0.57-0.68) | 0.59 (0.54-0.65) | 0.63 (0.57-0.7) | |
| **2010** | 0.66 (0.6-0.73) | 0.64 (0.59-0.7) | 0.6 (0.55-0.66) | 0.64 (0.58-0.71) | |
| **2011** | 0.69 (0.63-0.76) | 0.62 (0.57-0.68) | 0.61 (0.56-0.66) | 0.66 (0.6-0.73) | |
| **2012** | 0.68 (0.62-0.75) | 0.64 (0.59-0.7) | 0.6 (0.56-0.66) | 0.73 (0.66-0.8) | |
| **2013** | 0.71 (0.64-0.78) | 0.62 (0.57-0.68) | 0.62 (0.57-0.67) | 0.71 (0.65-0.78) | |
| **2014** | 0.69 (0.63-0.75) | 0.63 (0.58-0.69) | 0.61 (0.56-0.66) | 0.7 (0.64-0.77) | |
| **2015** | 0.64 (0.58-0.71) | 0.64 (0.59-0.7) | 0.59 (0.55-0.64) | 0.72 (0.66-0.79) | |
| **2016** | 0.69 (0.63-0.76) | 0.62 (0.57-0.68) | 0.65 (0.61-0.71) | 0.68 (0.62-0.75) | |
| **2017** | 0.68 (0.62-0.74) | 0.65 (0.6-0.71) | 0.62 (0.57-0.67) | 0.68 (0.62-0.74) | |
| **2018** | 0.69 (0.63-0.76) | 0.66 (0.61-0.72) | 0.63 (0.58-0.68) | 0.71 (0.65-0.78) | |
| **2019** | 0.69 (0.63-0.76) | 0.67 (0.62-0.73) | 0.68 (0.63-0.73) | 0.7 (0.64-0.76) | |
| **2020** | 0.78 (0.71-0.85) | 0.75 (0.69-0.81) | 0.71 (0.66-0.76) | 0.79 (0.72-0.85) | |

| **Supplementary Table 6:** CVD Burden in Leukemia-Related Reporting Odds Ratio Stratified by Race in the Unites States, 1999-2020 | | | | | |
| --- | --- | --- | --- | --- | --- |
| **Reporting Odds Ratio (95% CI)** | | | | | |
| **Year** | **American Indian or Alaska Native** | **Asian or Pacific Islander** | **Black or African American** | **White** | **Hispanic or Latino** |
| **15-24 Age Group** | | | | | |
| **1999** | Suppressed | Suppressed | Suppressed | 1.842 (1.389-2.444) | 3.309 (2.212-4.949) |
| **2000** | Suppressed | Suppressed | Suppressed | 2.092 (1.574-2.779) | 2.772 (1.758-4.371) |
| **2001** | Suppressed | Suppressed | Suppressed | 1.687 (1.249-2.277) | 3.037 (2.009-4.591) |
| **2002** | Suppressed | Suppressed | Suppressed | 2.045 (1.541-2.714) | 2.852 (1.901-4.28) |
| **2003** | Suppressed | Suppressed | Suppressed | 1.783 (1.295-2.456) | 3.118 (2.002-4.854) |
| **2004** | Suppressed | Suppressed | Suppressed | 1.95 (1.44-2.64) | 3.18 (2.126-4.757) |
| **2005** | Suppressed | Suppressed | Suppressed | 1.661 (1.208-2.284) | 2.818 (1.923-4.131) |
| **2006** | Suppressed | Suppressed | Suppressed | 1.982 (1.48-2.655) | 3.149 (2.131-4.653) |
| **2007** | Suppressed | Suppressed | Suppressed | 1.987 (1.458-2.707) | 2.79 (1.87-4.163) |
| **2008** | Suppressed | Suppressed | Suppressed | 2.112 (1.532-2.91) | 2.196 (1.425-3.383) |
| **2009** | Suppressed | Suppressed | Suppressed | 1.971 (1.435-2.707) | 1.934 (1.235-3.027) |
| **2010** | Suppressed | Suppressed | Suppressed | 1.7 (1.209-2.391) | 2.008 (1.304-3.093) |
| **2011** | Suppressed | Suppressed | Suppressed | 1.774 (1.214-2.592) | 2.068 (1.394-3.066) |
| **2012** | Suppressed | Suppressed | Suppressed | 1.885 (1.315-2.701) | 2.076 (1.346-3.202) |
| **2013** | Suppressed | Suppressed | Suppressed | 2.295 (1.627-3.238) | 2.494 (1.68-3.701) |
| **2014** | Suppressed | Suppressed | Suppressed | 1.917 (1.323-2.778) | 2.005 (1.321-3.044) |
| **2015** | Suppressed | Suppressed | Suppressed | 2.533 (1.812-3.541) | 3.007 (2.068-4.371) |
| **2016** | Suppressed | Suppressed | Suppressed | 1.922 (1.307-2.827) | 3.297 (2.308-4.712) |
| **2017** | Suppressed | Suppressed | Suppressed | 2.456 (1.668-3.615) | 2.833 (1.951-4.114) |
| **2018** | Suppressed | Suppressed | Suppressed | 2.111 (1.437-3.101) | 2.591 (1.73-3.879) |
| **2019** | Suppressed | Suppressed | Suppressed | 2.352 (1.603-3.45) | 2.303 (1.533-3.46) |
| **2020** | Suppressed | Suppressed | Suppressed | 2.05 (1.341-3.135) | 2.861 (1.927-4.247) |
| **25-34 Age Group** | | | | | |
| **1999** | Suppressed | Suppressed | 0.822 (0.463-1.46) | 1.025 (0.788-1.333) | 1.419 (0.894-2.252) |
| **2000** | Suppressed | Suppressed | 1.203 (0.772-1.874) | 1.162 (0.885-1.528) | 1.611 (0.98-2.649) |
| **2001** | Suppressed | Suppressed | 1.412 (0.899-2.22) | 1.437 (1.122-1.841) | 1.535 (0.988-2.386) |
| **2002** | Suppressed | Suppressed | 0.603 (0.311-1.171) | 0.941 (0.702-1.262) | 1.067 (0.603-1.888) |
| **2003** | Suppressed | Suppressed | 1.013 (0.605-1.696) | 1.16 (0.878-1.533) | 1.265 (0.758-2.111) |
| **2004** | Suppressed | Suppressed | 0.72 (0.399-1.301) | 1.434 (1.096-1.877) | 1.758 (1.131-2.735) |
| **2005** | Suppressed | Suppressed | 0.876 (0.533-1.442) | 1.038 (0.764-1.411) | 1.538 (0.996-2.375) |
| **2006** | Suppressed | Suppressed | 0.908 (0.508-1.622) | 1.051 (0.786-1.405) | 1.107 (0.684-1.792) |
| **2007** | Suppressed | Suppressed | 1.201 (0.718-2.008) | 1.038 (0.757-1.423) | 1.731 (1.181-2.537) |
| **2008** | Suppressed | Suppressed | 1.132 (0.686-1.869) | 1.096 (0.822-1.462) | 1.6 (1.093-2.342) |
| **2009** | Suppressed | Suppressed | 0.702 (0.389-1.268) | 1.067 (0.794-1.433) | 1.247 (0.832-1.869) |
| **2010** | Suppressed | Suppressed | 1.012 (0.573-1.789) | 1.062 (0.785-1.435) | 1.392 (0.931-2.081) |
| **2011** | Suppressed | Suppressed | 0.853 (0.487-1.493) | 1.068 (0.781-1.462) | 0.646 (0.376-1.109) |
| **2012** | Suppressed | Suppressed | 1.087 (0.614-1.924) | 1.134 (0.838-1.535) | 1.259 (0.817-1.94) |
| **2013** | Suppressed | Suppressed | 0.983 (0.568-1.704) | 1.199 (0.877-1.64) | 1.202 (0.781-1.849) |
| **2014** | Suppressed | Suppressed | 1.067 (0.641-1.778) | 1.214 (0.901-1.636) | 1.043 (0.669-1.625) |
| **2015** | Suppressed | Suppressed | 1.482 (0.946-2.322) | 1.181 (0.859-1.623) | 1.41 (0.95-2.094) |
| **2016** | Suppressed | Suppressed | 1.129 (0.662-1.924) | 1 (0.712-1.403) | 1.547 (1.049-2.282) |
| **2017** | Suppressed | Suppressed | 1.044 (0.57-1.911) | 1.385 (1.018-1.884) | 1.596 (1.078-2.361) |
| **2018** | Suppressed | Suppressed | 1.276 (0.73-2.23) | 1.4 (1.037-1.89) | 1.551 (1.009-2.385) |
| **2019** | Suppressed | Suppressed | 1.213 (0.728-2.02) | 1.364 (0.979-1.9) | 1.087 (0.7-1.69) |
| **2020** | Suppressed | Suppressed | 1.1 (0.649-1.866) | 1.323 (0.946-1.849) | 1.703 (1.163-2.494) |
| **35-44 Age Group** | | | | | |
| **1999** | Suppressed | Suppressed | 0.286 (0.161-0.508) | 0.678 (0.561-0.818) | 0.85 (0.559-1.292) |
| **2000** | Suppressed | Suppressed | 0.758 (0.523-1.097) | 0.69 (0.568-0.838) | 1.034 (0.695-1.539) |
| **2001** | Suppressed | Suppressed | 0.866 (0.609-1.232) | 0.672 (0.549-0.822) | 0.689 (0.427-1.113) |
| **2002** | Suppressed | Suppressed | 0.512 (0.313-0.836) | 0.545 (0.438-0.678) | 1.057 (0.739-1.511) |
| **2003** | Suppressed | Suppressed | 0.738 (0.517-1.055) | 0.596 (0.485-0.733) | 1.008 (0.674-1.509) |
| **2004** | Suppressed | Suppressed | 0.646 (0.434-0.96) | 0.644 (0.519-0.798) | 0.78 (0.514-1.184) |
| **2005** | Suppressed | Suppressed | 0.704 (0.465-1.065) | 0.658 (0.532-0.815) | 0.959 (0.644-1.428) |
| **2006** | Suppressed | Suppressed | 0.604 (0.399-0.915) | 0.656 (0.531-0.81) | 0.752 (0.49-1.154) |
| **2007** | Suppressed | Suppressed | 0.669 (0.457-0.979) | 0.717 (0.576-0.892) | 1.046 (0.726-1.506) |
| **2008** | Suppressed | Suppressed | 0.608 (0.394-0.936) | 0.688 (0.548-0.865) | 0.819 (0.56-1.198) |
| **2009** | Suppressed | Suppressed | 0.594 (0.379-0.932) | 0.674 (0.544-0.834) | 0.725 (0.483-1.089) |
| **2010** | Suppressed | Suppressed | 0.549 (0.36-0.836) | 0.728 (0.577-0.919) | 0.694 (0.459-1.05) |
| **2011** | Suppressed | Suppressed | 0.553 (0.368-0.831) | 0.638 (0.492-0.826) | 0.682 (0.461-1.009) |
| **2012** | Suppressed | Suppressed | 0.568 (0.363-0.89) | 0.613 (0.473-0.793) | 0.652 (0.436-0.977) |
| **2013** | Suppressed | Suppressed | 0.627 (0.405-0.97) | 0.528 (0.402-0.692) | 0.77 (0.532-1.115) |
| **2014** | Suppressed | Suppressed | 0.655 (0.426-1.008) | 0.625 (0.484-0.807) | 0.654 (0.442-0.967) |
| **2015** | Suppressed | Suppressed | 0.605 (0.385-0.95) | 0.536 (0.399-0.722) | 0.885 (0.596-1.316) |
| **2016** | Suppressed | Suppressed | 0.389 (0.225-0.673) | 0.929 (0.74-1.167) | 0.91 (0.632-1.308) |
| **2017** | Suppressed | Suppressed | 0.787 (0.521-1.191) | 0.766 (0.591-0.994) | 0.743 (0.515-1.071) |
| **2018** | Suppressed | Suppressed | 0.588 (0.372-0.93) | 0.72 (0.556-0.932) | 0.615 (0.406-0.931) |
| **2019** | Suppressed | Suppressed | 0.711 (0.484-1.044) | 0.775 (0.595-1.008) | 0.777 (0.541-1.116) |
| **2020** | Suppressed | Suppressed | 0.632 (0.417-0.959) | 0.914 (0.727-1.149) | 0.85 (0.598-1.208) |
| **45-54 Age Group** | | | | | |
| **1999** | Suppressed | 0.647 (0.361-1.16) | 0.334 (0.229-0.486) | 0.492 (0.429-0.566) | 0.501 (0.324-0.774) |
| **2000** | Suppressed | 0.871 (0.467-1.625) | 0.564 (0.427-0.745) | 0.488 (0.425-0.561) | 0.541 (0.358-0.817) |
| **2001** | Suppressed | 0.615 (0.352-1.074) | 0.548 (0.406-0.739) | 0.507 (0.443-0.58) | 0.717 (0.488-1.055) |
| **2002** | Suppressed | 0.578 (0.332-1.005) | 0.48 (0.354-0.652) | 0.495 (0.431-0.569) | 0.648 (0.423-0.994) |
| **2003** | Suppressed | 0.34 (0.143-0.806) | 0.663 (0.503-0.875) | 0.46 (0.396-0.533) | 0.775 (0.558-1.077) |
| **2004** | Suppressed | 0.78 (0.413-1.475) | 0.464 (0.34-0.631) | 0.488 (0.423-0.563) | 0.495 (0.328-0.746) |
| **2005** | Suppressed | 0.46 (0.239-0.884) | 0.484 (0.359-0.651) | 0.531 (0.462-0.61) | 0.563 (0.389-0.816) |
| **2006** | Suppressed | 0.596 (0.295-1.203) | 0.454 (0.326-0.633) | 0.578 (0.507-0.659) | 0.522 (0.353-0.772) |
| **2007** | Suppressed | 0.782 (0.433-1.414) | 0.499 (0.369-0.675) | 0.508 (0.44-0.586) | 0.676 (0.482-0.948) |
| **2008** | Suppressed | 0.82 (0.46-1.463) | 0.542 (0.407-0.72) | 0.544 (0.475-0.623) | 0.699 (0.5-0.977) |
| **2009** | Suppressed | 0.672 (0.405-1.116) | 0.586 (0.447-0.767) | 0.542 (0.472-0.622) | 0.725 (0.523-1.005) |
| **2010** | Suppressed | 0.511 (0.285-0.917) | 0.493 (0.362-0.671) | 0.556 (0.485-0.638) | 0.567 (0.395-0.813) |
| **2011** | Suppressed | 0.42 (0.241-0.732) | 0.497 (0.375-0.657) | 0.609 (0.534-0.695) | 0.616 (0.432-0.879) |
| **2012** | Suppressed | 0.666 (0.373-1.19) | 0.477 (0.353-0.646) | 0.597 (0.518-0.688) | 0.672 (0.478-0.946) |
| **2013** | Suppressed | 0.562 (0.297-1.063) | 0.576 (0.435-0.763) | 0.562 (0.486-0.651) | 0.557 (0.394-0.788) |
| **2014** | Suppressed | 0.671 (0.394-1.143) | 0.447 (0.329-0.607) | 0.58 (0.502-0.67) | 0.675 (0.501-0.909) |
| **2015** | Suppressed | 0.503 (0.252-1.004) | 0.568 (0.423-0.763) | 0.603 (0.521-0.698) | 0.697 (0.522-0.93) |
| **2016** | Suppressed | 0.447 (0.245-0.813) | 0.384 (0.273-0.54) | 0.604 (0.521-0.7) | 0.575 (0.404-0.818) |
| **2017** | Suppressed | 0.718 (0.437-1.18) | 0.495 (0.361-0.679) | 0.644 (0.554-0.749) | 0.649 (0.476-0.885) |
| **2018** | Suppressed | 0.568 (0.337-0.959) | 0.654 (0.49-0.873) | 0.491 (0.412-0.584) | 0.54 (0.393-0.741) |
| **2019** | Suppressed | 0.872 (0.53-1.435) | 0.57 (0.42-0.774) | 0.57 (0.483-0.672) | 0.667 (0.495-0.898) |
| **2020** | Suppressed | 0.803 (0.441-1.461) | 0.402 (0.29-0.557) | 0.633 (0.542-0.74) | 0.748 (0.566-0.987) |
| **55-64 Age Group** | | | | | |
| **1999** | Suppressed | 0.665 (0.418-1.056) | 0.553 (0.44-0.695) | 0.505 (0.462-0.553) | 0.509 (0.353-0.735) |
| **2000** | Suppressed | 0.462 (0.256-0.832) | 0.502 (0.395-0.637) | 0.48 (0.436-0.528) | 0.679 (0.497-0.927) |
| **2001** | Suppressed | 0.619 (0.372-1.031) | 0.447 (0.347-0.575) | 0.511 (0.467-0.559) | 0.567 (0.4-0.803) |
| **2002** | Suppressed | 0.584 (0.348-0.979) | 0.538 (0.432-0.671) | 0.479 (0.436-0.525) | 0.621 (0.455-0.847) |
| **2003** | Suppressed | 0.506 (0.274-0.936) | 0.43 (0.334-0.555) | 0.492 (0.449-0.539) | 0.453 (0.313-0.656) |
| **2004** | Suppressed | 0.443 (0.241-0.812) | 0.498 (0.396-0.625) | 0.5 (0.457-0.547) | 0.454 (0.318-0.648) |
| **2005** | Suppressed | 0.58 (0.355-0.947) | 0.537 (0.423-0.682) | 0.517 (0.473-0.566) | 0.657 (0.493-0.875) |
| **2006** | Suppressed | 0.415 (0.227-0.756) | 0.545 (0.441-0.673) | 0.512 (0.469-0.559) | 0.636 (0.465-0.869) |
| **2007** | Suppressed | 0.647 (0.398-1.052) | 0.508 (0.408-0.631) | 0.525 (0.481-0.574) | 0.458 (0.334-0.628) |
| **2008** | Suppressed | 0.695 (0.463-1.044) | 0.536 (0.435-0.661) | 0.497 (0.455-0.542) | 0.522 (0.385-0.709) |
| **2009** | Suppressed | 0.683 (0.436-1.071) | 0.479 (0.385-0.595) | 0.512 (0.469-0.558) | 0.484 (0.355-0.661) |
| **2010** | Suppressed | 0.549 (0.345-0.873) | 0.567 (0.461-0.698) | 0.522 (0.479-0.568) | 0.471 (0.351-0.634) |
| **2011** | Suppressed | 0.634 (0.428-0.941) | 0.534 (0.433-0.658) | 0.524 (0.481-0.571) | 0.668 (0.511-0.873) |
| **2012** | Suppressed | 0.862 (0.588-1.263) | 0.562 (0.461-0.687) | 0.527 (0.483-0.575) | 0.575 (0.446-0.741) |
| **2013** | Suppressed | 0.501 (0.327-0.766) | 0.508 (0.414-0.622) | 0.556 (0.511-0.606) | 0.67 (0.523-0.859) |
| **2014** | Suppressed | 0.601 (0.406-0.888) | 0.603 (0.5-0.728) | 0.556 (0.51-0.606) | 0.536 (0.41-0.701) |
| **2015** | Suppressed | 0.588 (0.369-0.939) | 0.501 (0.407-0.618) | 0.559 (0.513-0.61) | 0.528 (0.407-0.687) |
| **2016** | Suppressed | 0.561 (0.368-0.854) | 0.53 (0.437-0.644) | 0.569 (0.522-0.62) | 0.617 (0.485-0.784) |
| **2017** | Suppressed | 0.633 (0.415-0.963) | 0.572 (0.47-0.695) | 0.56 (0.514-0.61) | 0.619 (0.485-0.791) |
| **2018** | Suppressed | 0.637 (0.436-0.93) | 0.594 (0.495-0.714) | 0.567 (0.52-0.618) | 0.599 (0.465-0.771) |
| **2019** | Suppressed | 0.733 (0.53-1.015) | 0.58 (0.478-0.705) | 0.609 (0.559-0.663) | 0.58 (0.456-0.737) |
| **2020** | Suppressed | 0.617 (0.416-0.915) | 0.658 (0.553-0.782) | 0.651 (0.6-0.706) | 0.661 (0.528-0.828) |
| **65-74 Age Group** | | | | | |
| **1999** | Suppressed | 0.437 (0.262-0.727) | 0.563 (0.473-0.671) | 0.526 (0.497-0.557) | 0.524 (0.395-0.694) |
| **2000** | Suppressed | 0.689 (0.442-1.075) | 0.476 (0.391-0.578) | 0.508 (0.479-0.539) | 0.425 (0.315-0.573) |
| **2001** | Suppressed | 0.639 (0.421-0.971) | 0.458 (0.379-0.554) | 0.491 (0.462-0.522) | 0.599 (0.469-0.764) |
| **2002** | Suppressed | 0.492 (0.311-0.778) | 0.484 (0.397-0.59) | 0.512 (0.482-0.543) | 0.493 (0.371-0.656) |
| **2003** | Suppressed | 0.517 (0.326-0.819) | 0.524 (0.434-0.633) | 0.513 (0.483-0.545) | 0.642 (0.498-0.829) |
| **2004** | Suppressed | 0.603 (0.409-0.89) | 0.59 (0.499-0.698) | 0.527 (0.495-0.56) | 0.589 (0.454-0.765) |
| **2005** | Suppressed | 0.572 (0.389-0.842) | 0.492 (0.406-0.596) | 0.503 (0.472-0.535) | 0.575 (0.451-0.732) |
| **2006** | Suppressed | 0.563 (0.369-0.859) | 0.598 (0.502-0.712) | 0.534 (0.502-0.568) | 0.587 (0.462-0.746) |
| **2007** | Suppressed | 0.592 (0.41-0.854) | 0.517 (0.43-0.622) | 0.544 (0.511-0.579) | 0.579 (0.449-0.748) |
| **2008** | Suppressed | 0.494 (0.324-0.753) | 0.527 (0.44-0.631) | 0.569 (0.536-0.604) | 0.478 (0.365-0.626) |
| **2009** | Suppressed | 0.509 (0.358-0.723) | 0.608 (0.512-0.721) | 0.553 (0.521-0.587) | 0.49 (0.379-0.634) |
| **2010** | Suppressed | 0.577 (0.406-0.82) | 0.567 (0.475-0.676) | 0.54 (0.508-0.574) | 0.529 (0.41-0.683) |
| **2011** | Suppressed | 0.531 (0.376-0.751) | 0.583 (0.49-0.694) | 0.547 (0.515-0.581) | 0.577 (0.458-0.725) |
| **2012** | Suppressed | 0.601 (0.431-0.837) | 0.54 (0.454-0.641) | 0.543 (0.512-0.576) | 0.559 (0.443-0.706) |
| **2013** | Suppressed | 0.469 (0.319-0.689) | 0.591 (0.502-0.695) | 0.551 (0.521-0.584) | 0.563 (0.456-0.696) |
| **2014** | Suppressed | 0.554 (0.39-0.788) | 0.504 (0.422-0.602) | 0.569 (0.538-0.603) | 0.685 (0.56-0.838) |
| **2015** | Suppressed | 0.607 (0.441-0.835) | 0.557 (0.468-0.663) | 0.578 (0.546-0.612) | 0.512 (0.407-0.642) |
| **2016** | Suppressed | 0.58 (0.425-0.792) | 0.543 (0.461-0.64) | 0.591 (0.559-0.624) | 0.591 (0.481-0.725) |
| **2017** | Suppressed | 0.77 (0.586-1.012) | 0.559 (0.478-0.654) | 0.594 (0.562-0.628) | 0.605 (0.493-0.742) |
| **2018** | Suppressed | 0.49 (0.358-0.671) | 0.625 (0.539-0.725) | 0.609 (0.577-0.642) | 0.586 (0.478-0.718) |
| **2019** | Suppressed | 0.725 (0.551-0.954) | 0.555 (0.476-0.648) | 0.611 (0.579-0.645) | 0.566 (0.464-0.691) |
| **2020** | Suppressed | 0.604 (0.463-0.788) | 0.651 (0.567-0.747) | 0.657 (0.624-0.69) | 0.733 (0.613-0.875) |
| **75-84 Age Group** | | | | | |
| **1999** | Suppressed | 0.577 (0.382-0.871) | 0.582 (0.492-0.689) | 0.555 (0.531-0.58) | 0.558 (0.421-0.738) |
| **2000** | Suppressed | 0.49 (0.323-0.744) | 0.592 (0.498-0.703) | 0.548 (0.524-0.573) | 0.577 (0.442-0.753) |
| **2001** | Suppressed | 0.62 (0.423-0.909) | 0.622 (0.528-0.734) | 0.535 (0.511-0.56) | 0.572 (0.448-0.731) |
| **2002** | Suppressed | 0.573 (0.393-0.836) | 0.571 (0.483-0.675) | 0.552 (0.528-0.577) | 0.57 (0.438-0.742) |
| **2003** | Suppressed | 0.472 (0.317-0.704) | 0.578 (0.49-0.682) | 0.536 (0.512-0.561) | 0.553 (0.435-0.703) |
| **2004** | Suppressed | 0.515 (0.357-0.743) | 0.559 (0.471-0.663) | 0.566 (0.542-0.592) | 0.618 (0.489-0.781) |
| **2005** | Suppressed | 0.588 (0.407-0.848) | 0.582 (0.491-0.69) | 0.559 (0.535-0.585) | 0.641 (0.51-0.805) |
| **2006** | Suppressed | 0.577 (0.412-0.81) | 0.628 (0.534-0.739) | 0.569 (0.544-0.596) | 0.544 (0.428-0.69) |
| **2007** | Suppressed | 0.642 (0.458-0.901) | 0.645 (0.548-0.759) | 0.577 (0.552-0.604) | 0.595 (0.474-0.747) |
| **2008** | Suppressed | 0.555 (0.388-0.794) | 0.542 (0.454-0.647) | 0.577 (0.551-0.604) | 0.638 (0.52-0.783) |
| **2009** | Suppressed | 0.661 (0.48-0.91) | 0.563 (0.477-0.665) | 0.575 (0.549-0.602) | 0.573 (0.457-0.718) |
| **2010** | Suppressed | 0.508 (0.363-0.709) | 0.595 (0.502-0.706) | 0.589 (0.563-0.617) | 0.604 (0.494-0.737) |
| **2011** | Suppressed | 0.589 (0.429-0.809) | 0.534 (0.448-0.637) | 0.592 (0.566-0.62) | 0.571 (0.463-0.704) |
| **2012** | Suppressed | 0.524 (0.387-0.709) | 0.576 (0.487-0.682) | 0.592 (0.566-0.62) | 0.572 (0.469-0.696) |
| **2013** | Suppressed | 0.637 (0.475-0.853) | 0.53 (0.448-0.626) | 0.576 (0.55-0.603) | 0.542 (0.446-0.66) |
| **2014** | Suppressed | 0.594 (0.44-0.801) | 0.554 (0.467-0.657) | 0.603 (0.576-0.632) | 0.597 (0.493-0.723) |
| **2015** | Suppressed | 0.621 (0.469-0.822) | 0.526 (0.443-0.624) | 0.594 (0.566-0.622) | 0.598 (0.49-0.73) |
| **2016** | Suppressed | 0.58 (0.427-0.787) | 0.617 (0.526-0.725) | 0.62 (0.593-0.65) | 0.558 (0.46-0.676) |
| **2017** | Suppressed | 0.662 (0.512-0.858) | 0.536 (0.454-0.634) | 0.634 (0.607-0.663) | 0.614 (0.511-0.737) |
| **2018** | Suppressed | 0.668 (0.519-0.86) | 0.57 (0.487-0.668) | 0.621 (0.594-0.649) | 0.638 (0.535-0.761) |
| **2019** | Suppressed | 0.653 (0.512-0.831) | 0.603 (0.513-0.708) | 0.655 (0.627-0.683) | 0.678 (0.57-0.806) |
| **2020** | Suppressed | 0.572 (0.439-0.745) | 0.67 (0.58-0.775) | 0.699 (0.672-0.728) | 0.718 (0.614-0.839) |
| **85+ Age Group** | | | | | |
| **1999** | Suppressed | 0.778 (0.446-1.357) | 0.57 (0.445-0.729) | 0.627 (0.594-0.662) | 0.629 (0.429-0.92) |
| **2000** | Suppressed | 0.678 (0.371-1.241) | 0.588 (0.469-0.738) | 0.633 (0.6-0.667) | 0.612 (0.429-0.871) |
| **2001** | Suppressed | 0.728 (0.395-1.341) | 0.566 (0.444-0.722) | 0.6 (0.569-0.634) | 0.537 (0.36-0.799) |
| **2002** | Suppressed | 0.585 (0.304-1.126) | 0.586 (0.471-0.73) | 0.629 (0.597-0.664) | 0.51 (0.356-0.731) |
| **2003** | Suppressed | 0.825 (0.478-1.423) | 0.648 (0.521-0.807) | 0.64 (0.608-0.675) | 0.674 (0.489-0.929) |
| **2004** | Suppressed | 0.808 (0.501-1.303) | 0.588 (0.469-0.738) | 0.619 (0.587-0.653) | 0.654 (0.453-0.944) |
| **2005** | Suppressed | 0.5 (0.277-0.904) | 0.634 (0.506-0.794) | 0.641 (0.609-0.675) | 0.594 (0.424-0.833) |
| **2006** | Suppressed | 0.55 (0.343-0.884) | 0.698 (0.567-0.859) | 0.625 (0.594-0.658) | 0.593 (0.423-0.832) |
| **2007** | Suppressed | 0.568 (0.346-0.934) | 0.628 (0.503-0.784) | 0.649 (0.617-0.682) | 0.739 (0.539-1.013) |
| **2008** | Suppressed | 0.585 (0.366-0.933) | 0.606 (0.491-0.747) | 0.616 (0.585-0.647) | 0.542 (0.39-0.752) |
| **2009** | Suppressed | 0.524 (0.328-0.837) | 0.689 (0.555-0.854) | 0.628 (0.597-0.66) | 0.533 (0.399-0.711) |
| **2010** | Suppressed | 0.526 (0.346-0.801) | 0.559 (0.446-0.7) | 0.645 (0.614-0.677) | 0.582 (0.438-0.773) |
| **2011** | Suppressed | 0.605 (0.4-0.914) | 0.68 (0.558-0.829) | 0.639 (0.609-0.671) | 0.612 (0.456-0.821) |
| **2012** | Suppressed | 0.703 (0.482-1.025) | 0.722 (0.59-0.884) | 0.656 (0.626-0.689) | 0.616 (0.476-0.798) |
| **2013** | Suppressed | 0.648 (0.449-0.937) | 0.658 (0.53-0.817) | 0.659 (0.629-0.691) | 0.626 (0.487-0.806) |
| **2014** | Suppressed | 0.673 (0.451-1.003) | 0.551 (0.441-0.689) | 0.662 (0.632-0.693) | 0.6 (0.471-0.766) |
| **2015** | Suppressed | 0.609 (0.42-0.884) | 0.604 (0.486-0.751) | 0.647 (0.617-0.678) | 0.652 (0.516-0.824) |
| **2016** | Suppressed | 0.394 (0.262-0.593) | 0.683 (0.564-0.827) | 0.667 (0.637-0.698) | 0.652 (0.519-0.819) |
| **2017** | Suppressed | 0.587 (0.428-0.804) | 0.574 (0.466-0.707) | 0.66 (0.63-0.69) | 0.663 (0.533-0.826) |
| **2018** | Suppressed | 0.567 (0.396-0.813) | 0.636 (0.523-0.772) | 0.674 (0.644-0.706) | 0.643 (0.518-0.799) |
| **2019** | Suppressed | 0.522 (0.37-0.735) | 0.571 (0.471-0.693) | 0.695 (0.665-0.727) | 0.692 (0.557-0.859) |
| **2020** | Suppressed | 0.74 (0.555-0.987) | 0.732 (0.613-0.873) | 0.757 (0.726-0.789) | 0.651 (0.533-0.794) |

| **Supplementary Table 7:** CVD Burden in Leukemia-Related Deaths Reporting Odds Ratio Stratified by Census Place of Death in the Unites States, 1999-2020 | | | | | | | |
| --- | --- | --- | --- | --- | --- | --- | --- |
| **Deaths and Reporting Odds Ratio (95% CI)** | | | | | | | |
| **Cohort** | **Leukemia and CVD Deaths (A)** | **Total Leukemia Deaths (B)** | **Total CVD Deaths (C)** | **All-Cause Deaths (D)** | **A/B** | **C/D** | **ROR** |
| **15-24 Age Group** | | | | | | | |
| Medical Facility | 1898 | 7668 | 52016 | 309565 | 0.248 | 0.168 | 1.473 |
| Decedent's home | 161 | 1409 | 13244 | 138939 | 0.114 | 0.095 | 1.199 |
| Hospice facility | 12 | 97 | 415 | 2866 | 0.124 | 0.145 | 0.854 |
| Nursing home/long term care | - | - | - | - | - | - | - |
| Other/Unknown | 19 | 174 | 5486 | 241649 | 0.109 | 0.023 | 4.810 |
| **25-34 Age Group** | | | | | | | |
| Medical Facility | 2047 | 8207 | 130131 | 456185 | 0.249 | 0.285 | 0.874 |
| Decedent's home | 167 | 1486 | 47473 | 289152 | 0.112 | 0.164 | 0.685 |
| Hospice facility | 26 | 281 | 1782 | 10634 | 0.093 | 0.168 | 0.552 |
| Nursing home/long term care | 14 | 93 | 3111 | 12316 | 0.151 | 0.253 | 0.596 |
| Other/Unknown | 35 | 241 | 15172 | 274756 | 0.145 | 0.055 | 2.630 |
| **35-44 Age Group** | | | | | | | |
| Medical Facility | 2994 | 11843 | 371184 | 855610 | 0.253 | 0.434 | 0.583 |
| Decedent's home | 348 | 2552 | 159644 | 551767 | 0.136 | 0.289 | 0.471 |
| Hospice facility | 55 | 453 | 5960 | 34162 | 0.121 | 0.174 | 0.696 |
| Nursing home/long term care | 40 | 228 | 13212 | 47770 | 0.175 | 0.277 | 0.634 |
| Other/Unknown | 42 | 419 | 41314 | 294040 | 0.100 | 0.141 | 0.713 |
| **45-54 Age Group** | | | | | | | |
| Medical Facility | 6117 | 23016 | 992753 | 1899401 | 0.266 | 0.523 | 0.508 |
| Decedent's home | 989 | 6147 | 508190 | 1289012 | 0.161 | 0.394 | 0.408 |
| Hospice facility | 166 | 1094 | 24030 | 121680 | 0.152 | 0.197 | 0.768 |
| Nursing home/long term care | 162 | 736 | 60459 | 177409 | 0.220 | 0.341 | 0.646 |
| Other/Unknown | 157 | 913 | 103275 | 382180 | 0.172 | 0.270 | 0.636 |
| **55-64 Age Group** | | | | | | | |
| Medical Facility | 13451 | 46186 | 1912702 | 3331399 | 0.291 | 0.574 | 0.507 |
| Decedent's home | 3496 | 16521 | 1054268 | 2333470 | 0.212 | 0.452 | 0.468 |
| Hospice facility | 528 | 3164 | 72915 | 298875 | 0.167 | 0.244 | 0.684 |
| Nursing home/long term care | 686 | 2416 | 213891 | 497871 | 0.284 | 0.430 | 0.661 |
| Other/Unknown | 421 | 1983 | 160180 | 423424 | 0.212 | 0.378 | 0.561 |
| **65-74 Age Group** | | | | | | | |
| Medical Facility | 25319 | 76612 | 2954128 | 4757594 | 0.330 | 0.621 | 0.532 |
| Decedent's home | 9206 | 36749 | 1509220 | 3140309 | 0.251 | 0.481 | 0.521 |
| Hospice facility | 1569 | 7732 | 156929 | 476610 | 0.203 | 0.329 | 0.616 |
| Nursing home/long term care | 2716 | 8018 | 627978 | 1216589 | 0.339 | 0.516 | 0.656 |
| Other/Unknown | 993 | 4201 | 188506 | 443186 | 0.236 | 0.425 | 0.556 |
| **75-84 Age Group** | | | | | | | |
| Medical Facility | 33187 | 84756 | 4132672 | 6182492 | 0.392 | 0.668 | 0.586 |
| Decedent's home | 17653 | 58646 | 2128451 | 3914642 | 0.301 | 0.544 | 0.554 |
| Hospice facility | 2937 | 11897 | 295366 | 668453 | 0.247 | 0.442 | 0.559 |
| Nursing home/long term care | 9298 | 23665 | 1934536 | 3304530 | 0.393 | 0.585 | 0.671 |
| Other/Unknown | 2212 | 7981 | 320613 | 653105 | 0.277 | 0.491 | 0.565 |
| **85+ Age Group** | | | | | | | |
| Medical Facility | 19322 | 41129 | 3542006 | 5072133 | 0.470 | 0.698 | 0.673 |
| Decedent's home | 15359 | 40185 | 2451142 | 3753780 | 0.382 | 0.653 | 0.585 |
| Hospice facility | 2735 | 8740 | 432461 | 768095 | 0.313 | 0.563 | 0.556 |
| Nursing home/long term care | 16167 | 34940 | 4190898 | 6480050 | 0.463 | 0.647 | 0.715 |
| Other/Unknown | 2722 | 7389 | 546167 | 904942 | 0.368 | 0.604 | 0.610 |
